# Supplementary material for: Undecenyl resorc[4]arene in the chair conformation as preorganized synthon for olefin metathesis
Source: Royal Society of Chemistry journal article supplement (doi:10.1039/c3ra42943a), 2013-01-01
Supplement: c3ra42943a.pdf [file c3ra42943a.pdf]

# Undecenyl resorc[4]arene in the *chair* conformation as preorganized synthon for olefin metathesis

Francesca Ghirga,<sup>a</sup> Ilaria D'Acquarica,<sup>\*a</sup> Giuliano Delle Monache,<sup>a</sup> Sara Toscano,<sup>a</sup> Luisa Mannina,<sup>a</sup> Anatoly P. Sobolev,<sup>b</sup> Franco Ugozzoli,<sup>c</sup> Domenico Crocco,<sup>c</sup> and Bruno Botta<sup>\*a</sup>

**ELECTRONIC SUPPLEMENTARY INFORMATION (ESI)**

## TABLE OF CONTENTS

|                                                                                      |         |
|--------------------------------------------------------------------------------------|---------|
| NMR signals of undecenyl resorc[4]arene <b>1a</b> (Table 1S)                         | S3      |
| NMR signals of undecenyl resorc[4]arene <b>1b</b> (Table 2S)                         | S4      |
| NMR signals of undecenyl resorc[4]arene <b>1c</b> (Table 3S)                         | S5      |
| Self-assembly of resorc[4]arene <b>1a</b> in the crystal lattice (Figure 1S)         | S6      |
| Crystal data, data collection and refinement parameters for resorc[4]arene <b>1a</b> | S7      |
| Structures of the second-generation Grubbs and Grubbs-Hoveyda catalysts (Figure 2S)  | S8      |
| NMR signals of bicyclic alkene <b>2a</b> (Table 4S)                                  | S9      |
| NMR signals of linear dimer <b>3a</b> (Table 5S)                                     | S10     |
| ESI-HRMS spectrum of $\omega$ -undecenyl ( <i>E</i> )-2,4-dimethoxycinnamate         | S11     |
| ESI-HRMS spectrum of undecenyl resorc[4]arenes <b>1a–1c</b>                          | S12     |
| ESI-HRMS spectrum of bicyclic alkene <b>2a</b>                                       | S13     |
| ESI-HRMS spectrum of linear dimer <b>3a</b>                                          | S14     |
| NMR spectra of $\omega$ -undecenyl ( <i>E</i> )-2,4-dimethoxycinnamate               | S15–S16 |
| NMR spectra of undecenyl resorc[4]arene <b>1a</b> ( <i>chair</i> )                   | S17–S18 |
| NMR spectra of undecenyl resorc[4]arene <b>1b</b> ( <i>cone</i> )                    | S19–S20 |
| NMR spectra of undecenyl resorc[4]arene <b>1c</b> ( <i>1,2-alternate</i> )           | S21–S22 |
| NMR spectra of bicyclic alkene <b>2a</b>                                             | S23–S24 |
| 2D NMR spectra of bicyclic alkene <b>2a</b>                                          | S25–S28 |
| NMR spectra of linear dimer <b>3a</b>                                                | S29–S30 |
| FT-IR (KBr) spectrum of polymer <b>P1a</b> (Figure 3S)                               | S31     |
| Spectra of reduction compound <b>2ar</b>                                             | S32–S34 |
| Computational methods                                                                | S35     |
| Solid state $^{13}\text{C}$ CPMAS NMR spectroscopy                                   | S36     |
| Cartesian coordinates for model complexes (A) and (B)                                | S37–S38 |
| References                                                                           | S39     |

**Table 1S.**  $^1\text{H}$  NMR and  $^{13}\text{C}$  NMR signals\* of undecenyl resorc[4]arene **1a** (*chair*)

| Carbon                                  | $^{13}\text{C}$                      | $^1\text{H}$                                |
|-----------------------------------------|--------------------------------------|---------------------------------------------|
| C=O                                     | 172.4                                | -                                           |
| C <sub>Ar</sub> -O                      | 156.6<br>155.8                       | -                                           |
| =CH                                     | 139.2                                | 5.82 ddt (17.2, 10.2, 6)                    |
| CH <sub>i</sub> (26,28)                 | 126.6                                | 6.19 s                                      |
| CH <sub>i</sub> (25,27)                 | 125.7                                | 6.82 s                                      |
| C <sub>Ar</sub> -C                      | 125.3<br>122.6                       | -                                           |
| =CH <sub>2</sub>                        | 114.3                                | 4.99 br d (17.2)<br>4.92 br d (10.2)        |
| CH <sub>e</sub> (5,17)                  | 97.1                                 | 6.47 s                                      |
| CH <sub>e</sub> (11,23)                 | 95.3                                 | 6.39 s                                      |
| OCH <sub>2</sub>                        | 64.3                                 | 3.98 br t<br>3.92 t                         |
| OMe                                     | 56.0<br>56.0                         | 3.88 s<br>3.64 s                            |
| CH <sub>2</sub> -(CO)                   | 39.6                                 | 2.73 dd (14.5, 10.5)<br>2.65 dd (14.5, 6.5) |
| CH <sub>2</sub> -(CH=)                  | 34.0                                 | 2.05 q (6)                                  |
| CH                                      | 33.0                                 | 5.04 dd (10.5, 6.5)                         |
| CH <sub>2</sub> -(CH <sub>2</sub> -CH=) | 29.1                                 | 1.46 m                                      |
| CH <sub>2</sub> -(CH <sub>2</sub> O)    | 28.7                                 | 1.38 m                                      |
| CH <sub>2</sub> × 5                     | 29.6<br>29.6<br>29.5<br>29.3<br>26.0 | 1.24 br m                                   |

\* 600 MHz ( $^1\text{H}$ ) and 100 MHz ( $^{13}\text{C}$ ),  $\text{CDCl}_3$ ,  $T = 300\text{ K}$ ; coupling constants  $J$  (Hz) are given in parentheses.

**Table 2S.**  $^1\text{H}$  NMR and  $^{13}\text{C}$  NMR signals\* of undecenyl resorc[4]arene **1b** (*cone*)

| Carbon                                  | $^{13}\text{C}$                      | $^1\text{H}$                         |
|-----------------------------------------|--------------------------------------|--------------------------------------|
| C=O                                     | 172.5                                | -                                    |
| C <sub>Ar</sub> -O                      | 156.2                                | -                                    |
| =CH                                     | 139.3                                | 5.82 ddt (17.2, 10.2, 6.5)           |
| CH <sub>i</sub> (25,26,27,28)           | 126.0                                | 6.51 s                               |
| C <sub>Ar</sub> -C                      | 124.2                                | -                                    |
| =CH <sub>2</sub>                        | 114.3                                | 4.99 br d (17.2)<br>4.93 br d (10.2) |
| CH <sub>e</sub> (5,11,17,23)            | 96.4                                 | 6.30 s                               |
| OCH <sub>2</sub>                        | 64.4                                 | 3.95 t (6.8)                         |
| OMe                                     | 56.0                                 | 3.63 s                               |
| CH <sub>2</sub> -(CO)                   | 39.2                                 | 2.83 d (7.6)                         |
| CH <sub>2</sub> -(CH=)                  | 34.0                                 | 2.03 m (6.5)                         |
| CH                                      | 33.2                                 | 4.96 t (7.6)                         |
| CH <sub>2</sub> -(CH <sub>2</sub> -CH=) | 29.1                                 | 1.35 br m                            |
| CH <sub>2</sub> -(CH <sub>2</sub> O)    | 28.8                                 | 1.49 br m                            |
| CH <sub>2</sub> × 5                     | 29.7<br>29.6<br>29.5<br>29.3<br>26.0 | 1.27 br m                            |

\* 600 MHz ( $^1\text{H}$ ) and 100 MHz ( $^{13}\text{C}$ ),  $\text{CDCl}_3$ ,  $T = 300\text{ K}$ ; coupling constants  $J$  (Hz) are given in parentheses.

**Table 3S.**  $^1\text{H}$  NMR and  $^{13}\text{C}$  NMR signals\* of undecenyl resorc[4]arene **1c** (*1,2-alternate*)

| Carbon                                                                                                             | $^{13}\text{C}$                      | $^1\text{H}$                                       |
|--------------------------------------------------------------------------------------------------------------------|--------------------------------------|----------------------------------------------------|
| C=O                                                                                                                | 172.7 × 2<br>172.3<br>172.2          | -                                                  |
| C <sub>Ar</sub> -O (6,22)<br>C <sub>Ar</sub> -O (4,24)<br>C <sub>Ar</sub> -O (10,18)<br>C <sub>Ar</sub> -O (12,16) | 156.4<br>156.3<br>156.1<br>156.1     | -                                                  |
| =CH                                                                                                                | 139.2                                | 5.79 ddt (17.2, 10.2, 6.5)                         |
| CH <sub>i</sub> (25,28)<br>CH <sub>i</sub> (26,27)                                                                 | 127.6<br>126.5                       | 7.25 s<br>6.36 s                                   |
| C <sub>Ar</sub> -C (7,21)<br>C <sub>Ar</sub> -C (1,3)<br>C <sub>Ar</sub> -C (13,15)<br>C <sub>Ar</sub> -C (9,19)   | 124.7<br>124.4<br>124.0<br>123.4     | -                                                  |
| =CH <sub>2</sub>                                                                                                   | 114.4                                | 4.97 br d (17.2)<br>4.91 br d (10.2)               |
| CH <sub>e</sub> (11,17)<br>CH <sub>e</sub> (5,23)                                                                  | 96.7<br>96.0                         | 6.38 s<br>6.40 s                                   |
| OCH <sub>2</sub> (2)<br>OCH <sub>2</sub> (14)<br>OCH <sub>2</sub> (8,20)                                           | 64.4<br>63.1<br>64.4 × 2             | 4.00 t (7.0)<br>3.97 t (7.0)<br>3.91 t (7.0)       |
| OMe                                                                                                                | 56.4<br>56.1<br>55.9<br>55.9         | 3.83 s<br>3.82 s<br>3.75 s<br>3.64 s               |
| CH <sub>2</sub> -(CO) (2)<br>CH <sub>2</sub> -(CO) (14)<br>CH <sub>2</sub> -(CO) (8,20)                            | 41.2<br>40.3<br>39.4 × 2             | 2.87 d (8.0)<br>2.33 d (8.0)<br>2.88 dd (15.1)     |
| CH <sub>2</sub> -(CH=)                                                                                             | 34.0                                 | 2.03                                               |
| CH (2)<br>CH (14)<br>CH (8,20)                                                                                     | 34.0<br>33.6<br>34.0 × 2             | 5.46 t (8.0)<br>5.10 t (8.0)<br>5.06 dd (9.6, 6.5) |
| CH <sub>2</sub> -(CH <sub>2</sub> -CH=)                                                                            | 29.1                                 | 1.38 br m                                          |
| CH <sub>2</sub> -(CH <sub>2</sub> O)                                                                               | 28.8                                 | 1.45 br m                                          |
| CH <sub>2</sub> × 5                                                                                                | 29.7<br>29.7<br>29.7<br>29.6<br>26.0 | 1.27 br m                                          |

\* 600 MHz ( $^1\text{H}$ ) and 100 MHz ( $^{13}\text{C}$ ),  $\text{CDCl}_3$ ,  $T = 300\text{ K}$ ; coupling constants  $J$  (Hz) are given in parentheses.

**Figure 1S.** Perspective views of the self-assembly of resorc[4]arene **1a** in the crystal lattice through hydrophilic and hydrophobic layers, with approximate thickness of the layers: (a) front view; (b) side view. Colors are as follows: C, grey; O, red. Hydrogen atoms are omitted for clarity.

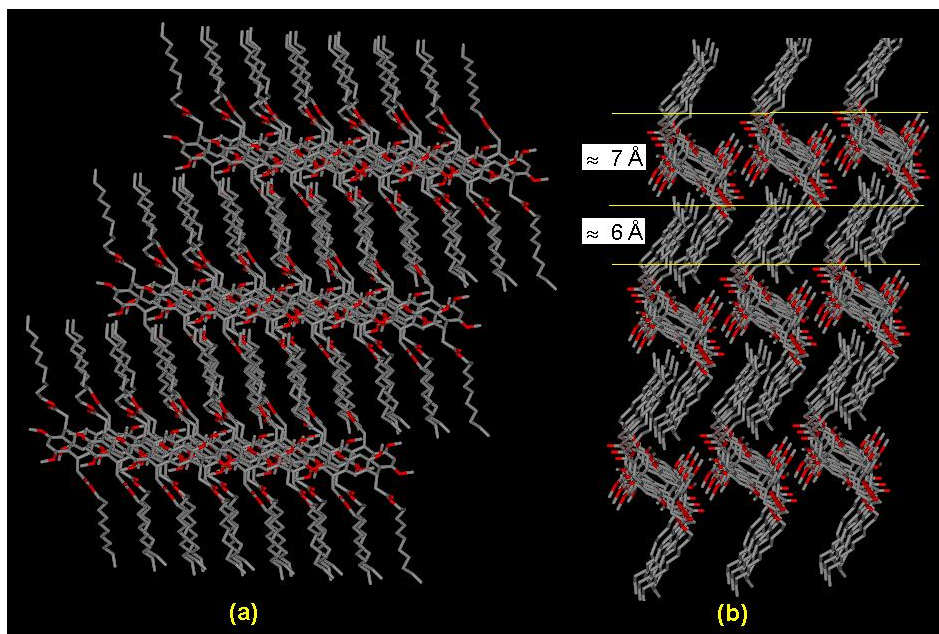

Crystal data, data collection and refinement parameters for resorc[4]arene **1a**

|                                                                  |                                                                        |
|------------------------------------------------------------------|------------------------------------------------------------------------|
| Chemical formula                                                 | C <sub>88</sub> H <sub>128</sub> O <sub>16</sub>                       |
| Formula weight                                                   | 1441.97                                                                |
| crystal system                                                   | triclinic                                                              |
| space group                                                      | <i>P1</i>                                                              |
| <i>a</i> (Å)                                                     | 12.297(5)                                                              |
| <i>b</i> (Å)                                                     | 17.946(5)                                                              |
| <i>c</i> (Å)                                                     | 10.559(5)                                                              |
| $\alpha$ (°)                                                     | 100.610(5)                                                             |
| $\beta$ (°)                                                      | 102.440(5)                                                             |
| $\gamma$ (°)                                                     | 105.110(5)                                                             |
| <i>V</i> (Å <sup>3</sup> )                                       | 2124(1)                                                                |
| <i>Z</i>                                                         | 1                                                                      |
| $\rho_{\text{calcd}}$ (g × cm <sup>-3</sup> )                    | 1.127                                                                  |
| $\mu$ (mm <sup>-1</sup> )                                        | 0.6 (Cu-K $\alpha$ )                                                   |
| <i>Data Collection and Refinement</i>                            |                                                                        |
| 2 $\theta$ max for data collection (°)                           | 139.98                                                                 |
| Temperature (K)                                                  | 293                                                                    |
| Data collected ( <i>h, k, l</i> )                                | (-14, -21, -12) to (14, 21, 12)                                        |
| Total reflections                                                | 8039                                                                   |
| Unique reflections                                               | 7989 ( <i>R</i> <sub>int</sub> = 0.0)                                  |
| Observed reflections                                             | 2598 [ <i>F</i> <sub>o</sub> > 4.0 $\sigma$ ( <i>F</i> <sub>o</sub> )] |
| Goodness-of-fit <i>S</i> on <i>F</i> <sup>2</sup> <sup>[a]</sup> | 1.040                                                                  |
| Final <i>R</i> indices (obs. data) <sup>[b]</sup>                | <i>R</i> <sub>1</sub> = 0.0639, <i>wR</i> <sub>2</sub> = 0.143         |
| Largest diff. peak and hole (e/Å <sup>-3</sup> )                 | 0.16/-0.12                                                             |

<sup>[a]</sup> Goodness-of-fit  $S = [\sum w(F_o^2 - F_c^2)^2 / (n-p)]^{1/2}$ , where *n* is the number of reflections and *p* the number of parameters. <sup>[b]</sup>  $R_1 = \sum ||F_o| - |F_c|| / \sum |F_o|$ ,  $wR_2 = [\sum w(F_o^2 - F_c^2)^2 / \sum wF_o^4]^{1/2}$ .

Intensity data and cell parameters were recorded at room temperature (293 K) on a Siemens AED diffractometer using graphite monochromated Cu-K $\alpha$  radiation. The intensities were corrected for Lorentz, polarization but not for absorption effects. This structure was characterized by poor diffraction, and several data collections carried out with different samples obtained from different crystallization methods always gave the same results.

The structure was solved by Direct methods using SIR2004 [1S] and refined on *F*<sub>o</sub><sup>2</sup> by full-matrix least-squares procedures, using SHELXL-97 [2S]. The structure of the macrocycle is pseudo-centrosymmetric. The resorc[4]arene basket is centrosymmetric, but the terminal ester chains are non-centrosymmetric. All the non-hydrogen atoms were refined with anisotropic atomic displacements excepting 15 carbon atoms of the long aliphatic chains which were refined with isotropic atomic displacements. The hydrogen atoms were included in the refinement at idealized geometry (C-H 1.0 Å) and refined “riding” on the corresponding parent atoms.

Molecular geometry calculations were carried out using the PARST97 program [3S].

**Figure 2S.** Structures of the second-generation Grubbs (left) and Grubbs-Hoveyda (right) catalysts.

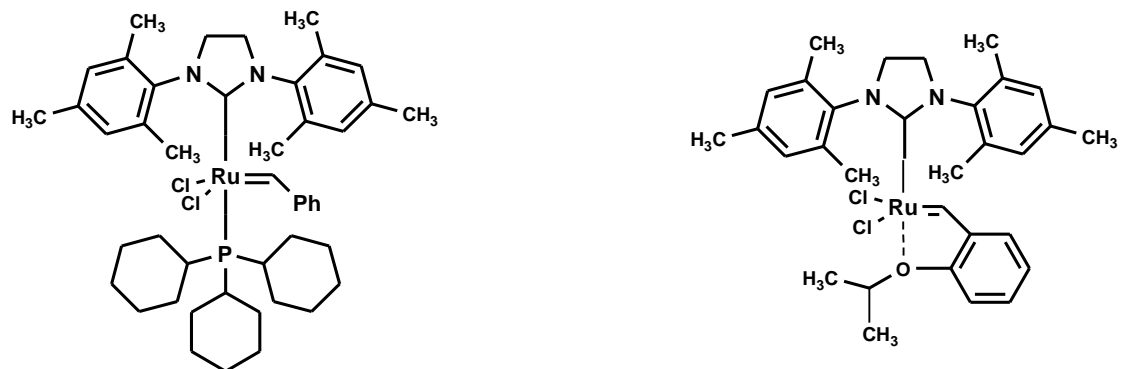



**Table 4S.**  $^1\text{H}$  NMR and  $^{13}\text{C}$  NMR signals\* of bicyclic alkene **2a**

| Carbon                                            | $^{13}\text{C}$                      | $^1\text{H}$                           |
|---------------------------------------------------|--------------------------------------|----------------------------------------|
| C=O                                               | 172.5                                | -                                      |
| C <sub>Ar</sub> -O                                | 156.5<br>155.6                       | -                                      |
| CH= ( <i>trans</i> )<br>CH= ( <i>cis</i> )        | 130.8<br>[130.1]                     | 5.34 br t (3)<br>[5.32 br t (4)]       |
| CH <sub>i</sub> (26,28)                           | 126.3                                | 6.17 br s<br>[6.18 br s]               |
| CH <sub>i</sub> (25,27)                           | 125.3                                | 6.84 br s<br>[6.85 br s]               |
| C <sub>Ar</sub> -C                                | 125.3<br>122.6                       | -                                      |
| CH <sub>e</sub> (5,17)<br>CH <sub>e</sub> (11,23) | 97.4<br>95.5                         | 6.48 s<br>6.40 s                       |
| OCH <sub>2</sub>                                  | 64.3                                 | 3.95 dd (11.5, 7)<br>3.89 m            |
| OMe                                               | 56.1<br>55.9                         | 3.64 s<br>3.90 s                       |
| CH <sub>2</sub> -(CO)                             | 39.7                                 | 2.69 dd (14.5, 7)<br>2.64 dd (14.5, 7) |
| CH <sub>2</sub> -(CH=)                            | 32.0<br>[26.8]                       | 2.01 m<br>[2.03 m]                     |
| CH                                                | 32.8                                 | 5.05 t (7)                             |
| CH <sub>2</sub> -(CH <sub>2</sub> -CH=)           | 28.9                                 | 1.35 m                                 |
| CH <sub>2</sub> -(CH <sub>2</sub> O)              | 28.6                                 | 1.50 m                                 |
| CH <sub>2</sub> × 5                               | 29.5<br>29.3<br>29.1<br>28.1<br>25.9 | 1.24 br m                              |

\* 600 MHz ( $^1\text{H}$ ) and 100 MHz ( $^{13}\text{C}$ ),  $\text{CDCl}_3$ ,  $T = 300\text{ K}$ ; coupling constants  $J$  (Hz) are given in parentheses. Proton and carbon resonances for the *cis* form, not coincident or overlapped by those of the *trans* form, are indicated by square brackets.

**Table 5S.**  $^1\text{H}$  NMR and  $^{13}\text{C}$  NMR signals\* of linear dimer **3a**

| Carbon                                            | $^{13}\text{C}$                      | $^1\text{H}$                                           |
|---------------------------------------------------|--------------------------------------|--------------------------------------------------------|
| C=O                                               | 172.5                                | -                                                      |
| C <sub>Ar</sub> -O                                | 156.5<br>155.6                       | -                                                      |
| CH= ( <i>trans</i> )<br>CH= ( <i>cis</i> )        | 130.8<br>130.3<br>[130.1]<br>[129.8] | 5.33 tt (3,1)<br>5.38 tt (3,1)<br>[5.35 m]<br>[5.36 m] |
| CH <sub>i</sub> (26,28)                           | 126.3                                | 6.18 br s                                              |
| CH <sub>i</sub> (25,27)                           | 125.3                                | 6.87 br s                                              |
| C <sub>Ar</sub> -C                                | 125.3<br>122.6                       | -                                                      |
| CH <sub>e</sub> (5,17)<br>CH <sub>e</sub> (11,23) | 97.4<br>95.5                         | 6.49 s<br>6.41 s                                       |
| OCH <sub>2</sub>                                  | 64.3                                 | 3.92 m<br>3.87 m                                       |
| OMe                                               | 56.1<br>55.9                         | 3.60 s<br>3.88 s                                       |
| CH <sub>2</sub> -(CO)                             | 39.7                                 | 2.67 m                                                 |
| CH <sub>2</sub> -(CH=)                            | 32.6<br>32.0<br>[26.7]<br>[26.8]     | 1.96 m<br>2.02 m<br>[2.03 m]<br>[2.03 m]               |
| CH                                                | 32.8                                 | 5.04 t (7.5)                                           |
| CH <sub>2</sub> -(CH <sub>2</sub> -CH=)           | 29.4<br>28.9                         | 1.32 m<br>1.35 m                                       |
| CH <sub>2</sub> -(CH <sub>2</sub> O)              | 28.6                                 | 1.50 m                                                 |
| CH <sub>2</sub> × 5                               | 29.5<br>29.3<br>29.1<br>28.1<br>25.9 | 1.24 br m                                              |

\* 600 MHz ( $^1\text{H}$ ) and 100 MHz ( $^{13}\text{C}$ ), CDCl<sub>3</sub>,  $T = 300$  K; coupling constants  $J$  (Hz) are given in parentheses. Proton and carbon resonances for the *cis* form, not coincident or overlapped by those of the *trans* form, are indicated by square brackets.

ESI-HRMS spectrum of  $\omega$ -undecenyl (*E*)-2,4-dimethoxycinnamate. Solvent: MeCN (40 ppm)

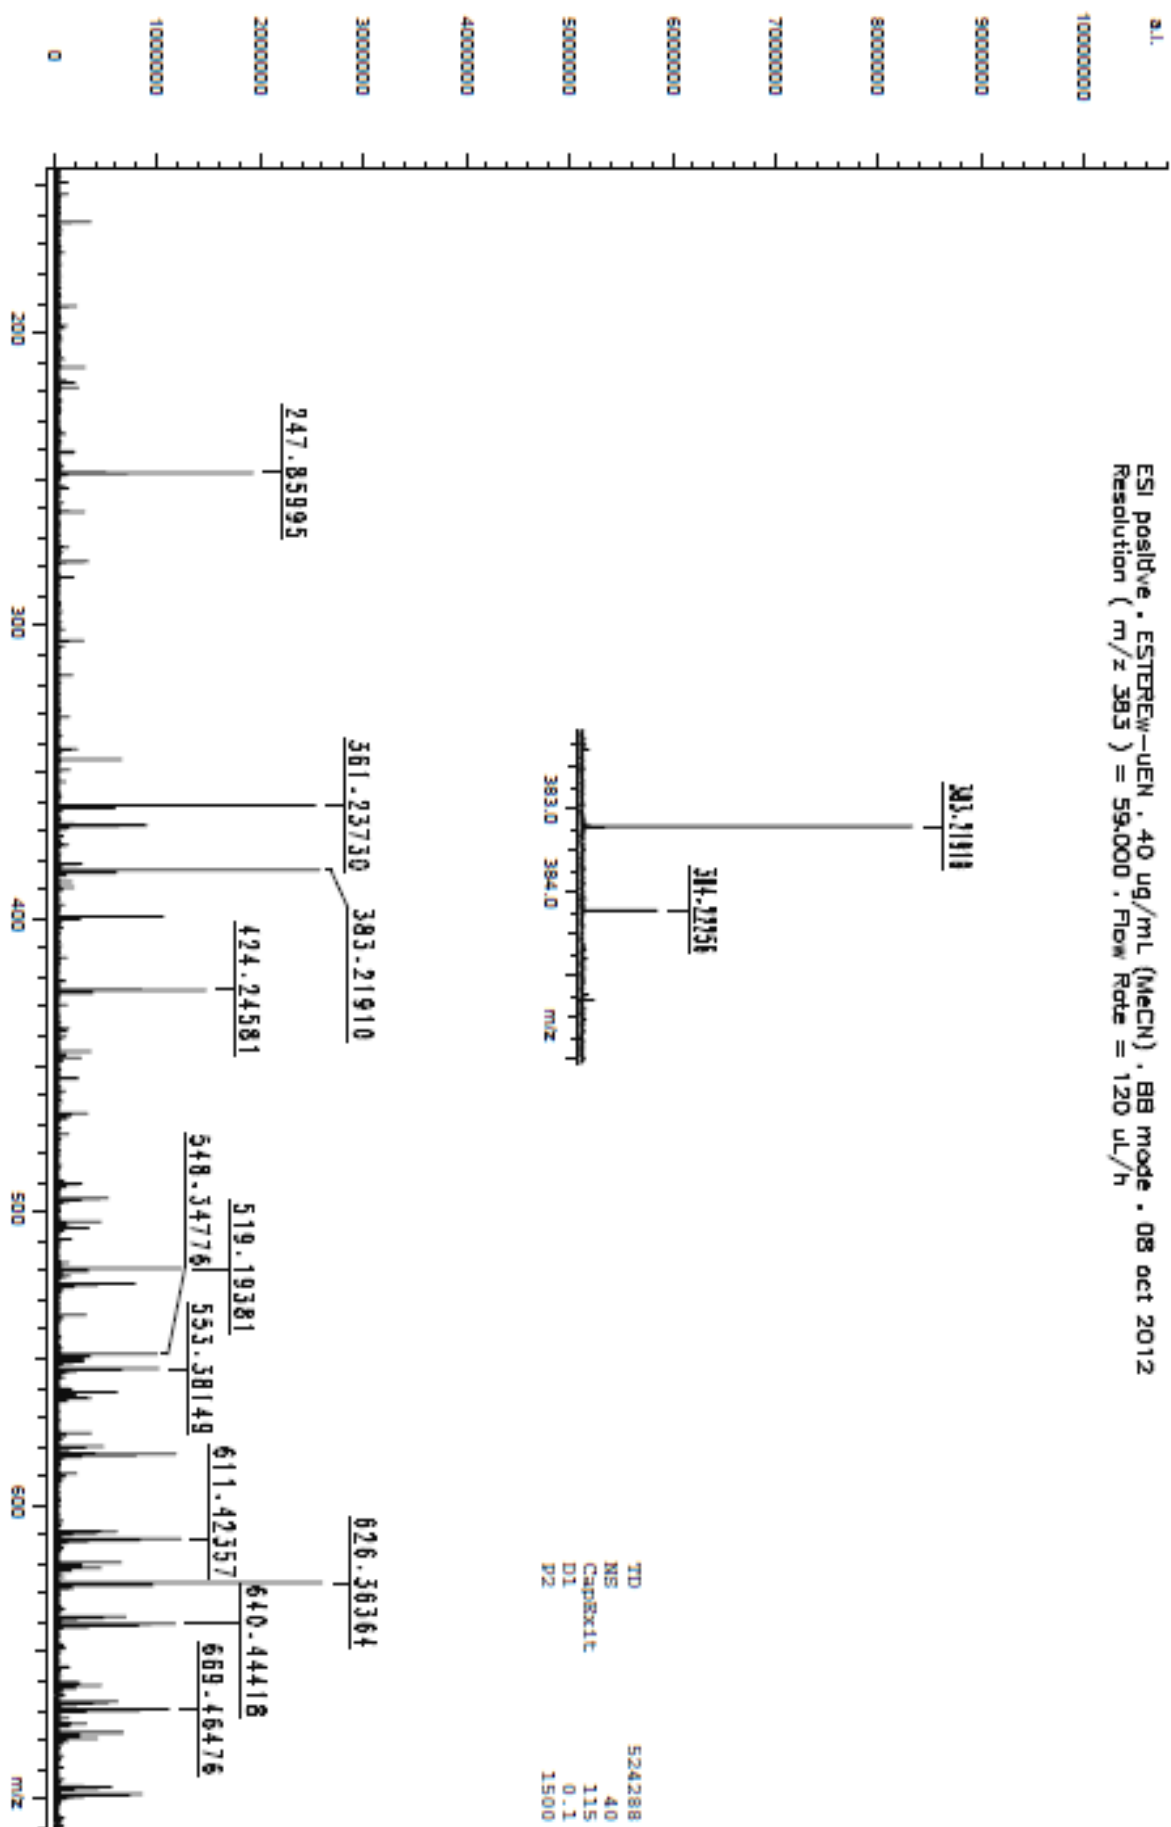

### ESI-HRMS spectrum of undecenyl resorc[4]arenes 1a–1c. Solvent: MeOH (5 ppm)

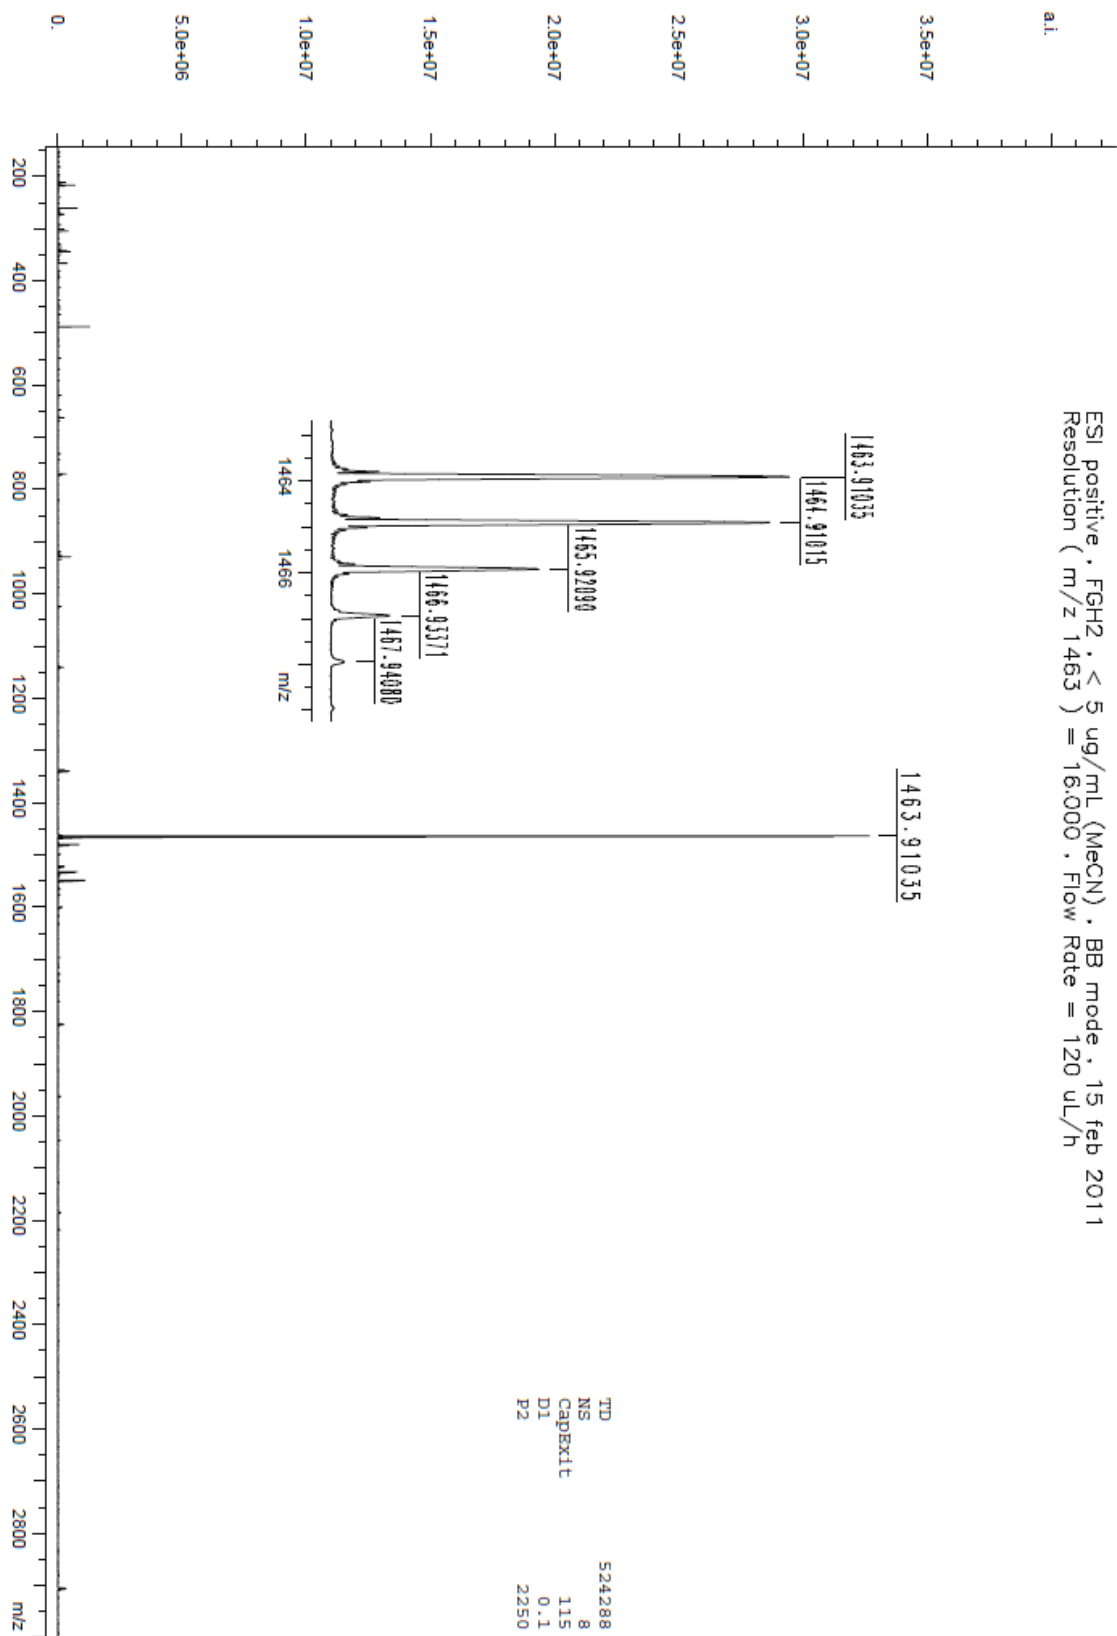

### ESI-HRMS spectrum of bicyclic alkene 2a. Solvent: MeCN (20 ppm)

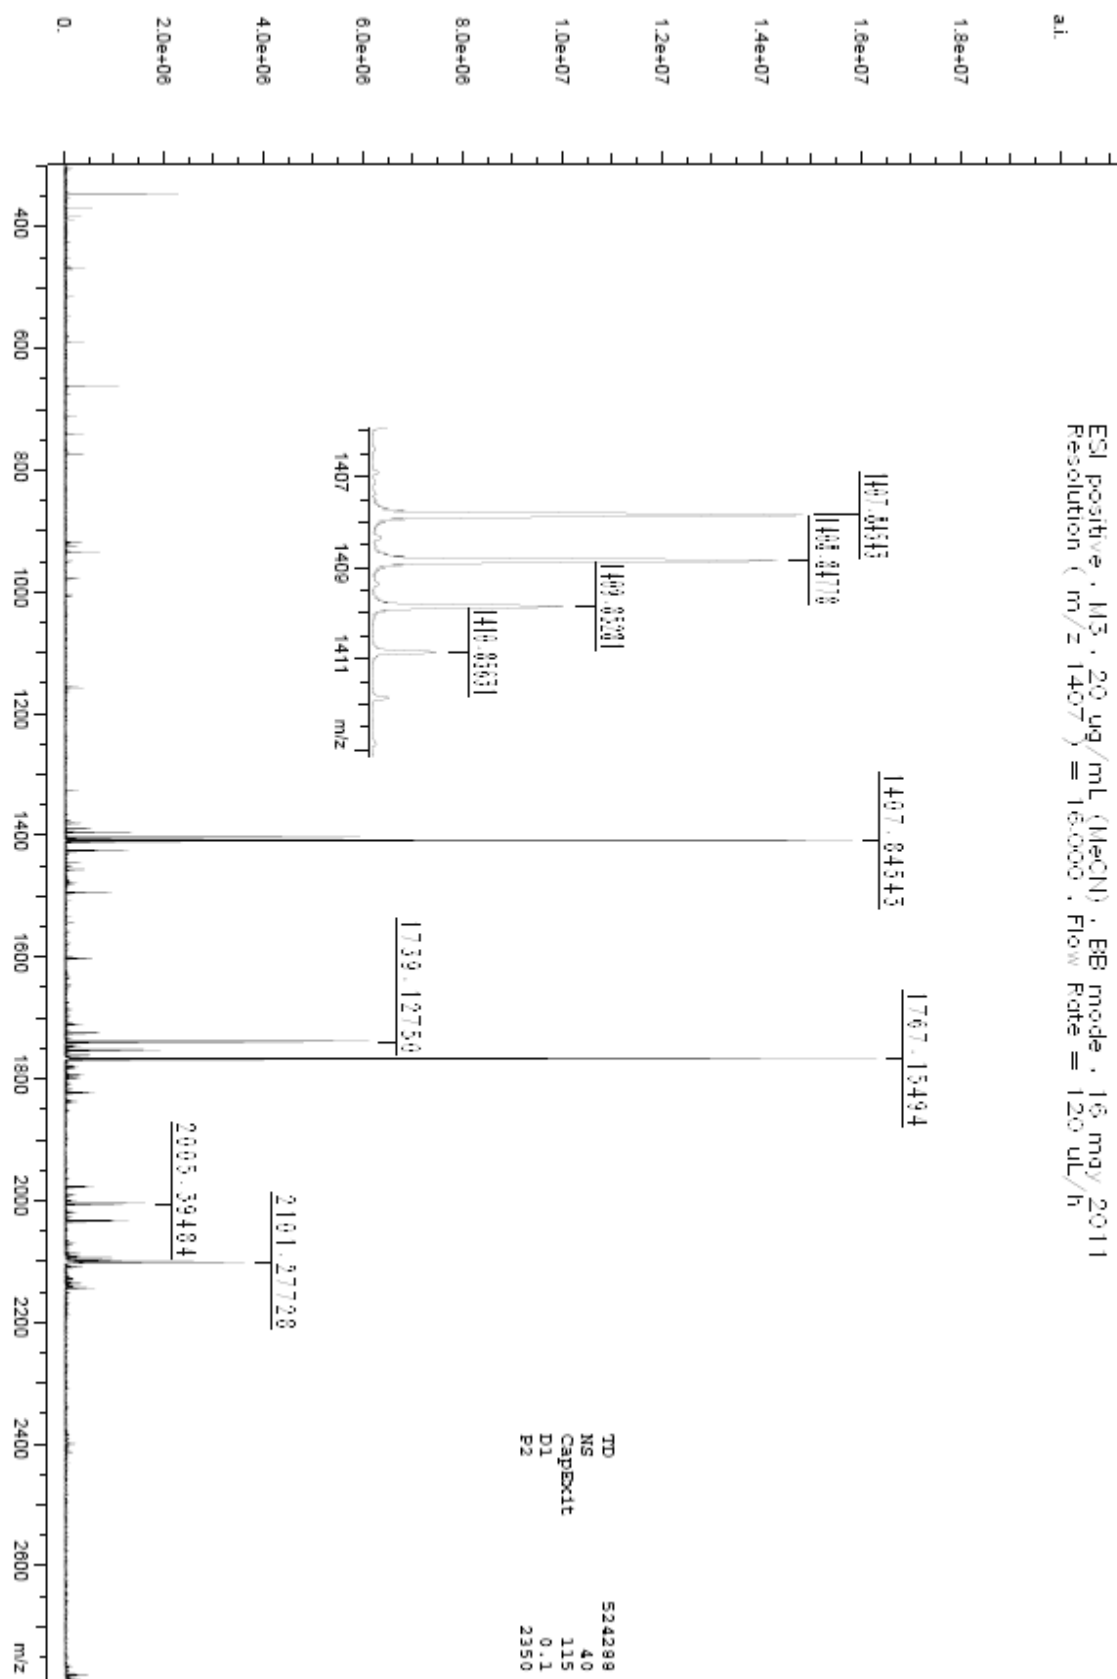

### ESI-HRMS spectrum of linear dimer 3a. Solvent: MeCN (30 ppm)

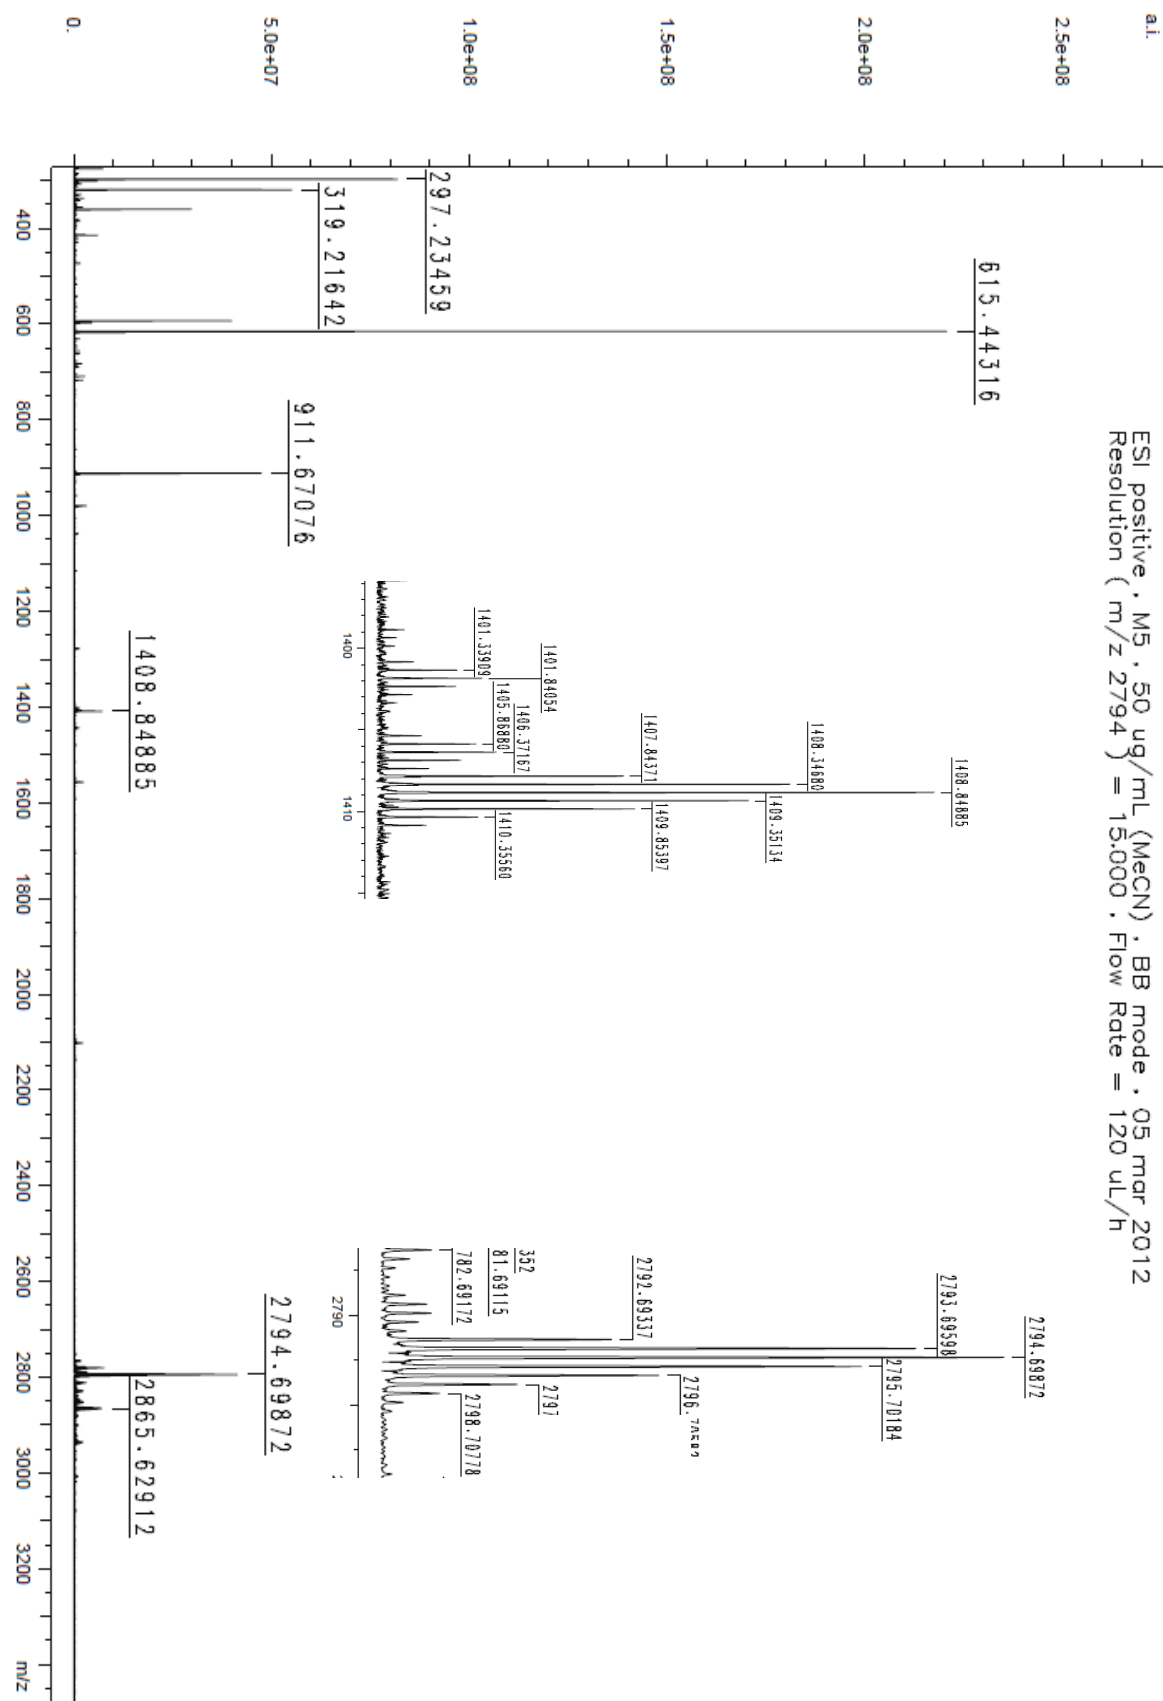

$^1\text{H}$  NMR spectrum of  $\omega$ -undecenyl (*E*)-2,4-dimethoxycinnamate. 600 MHz,  $\text{CDCl}_3$ , 300 K

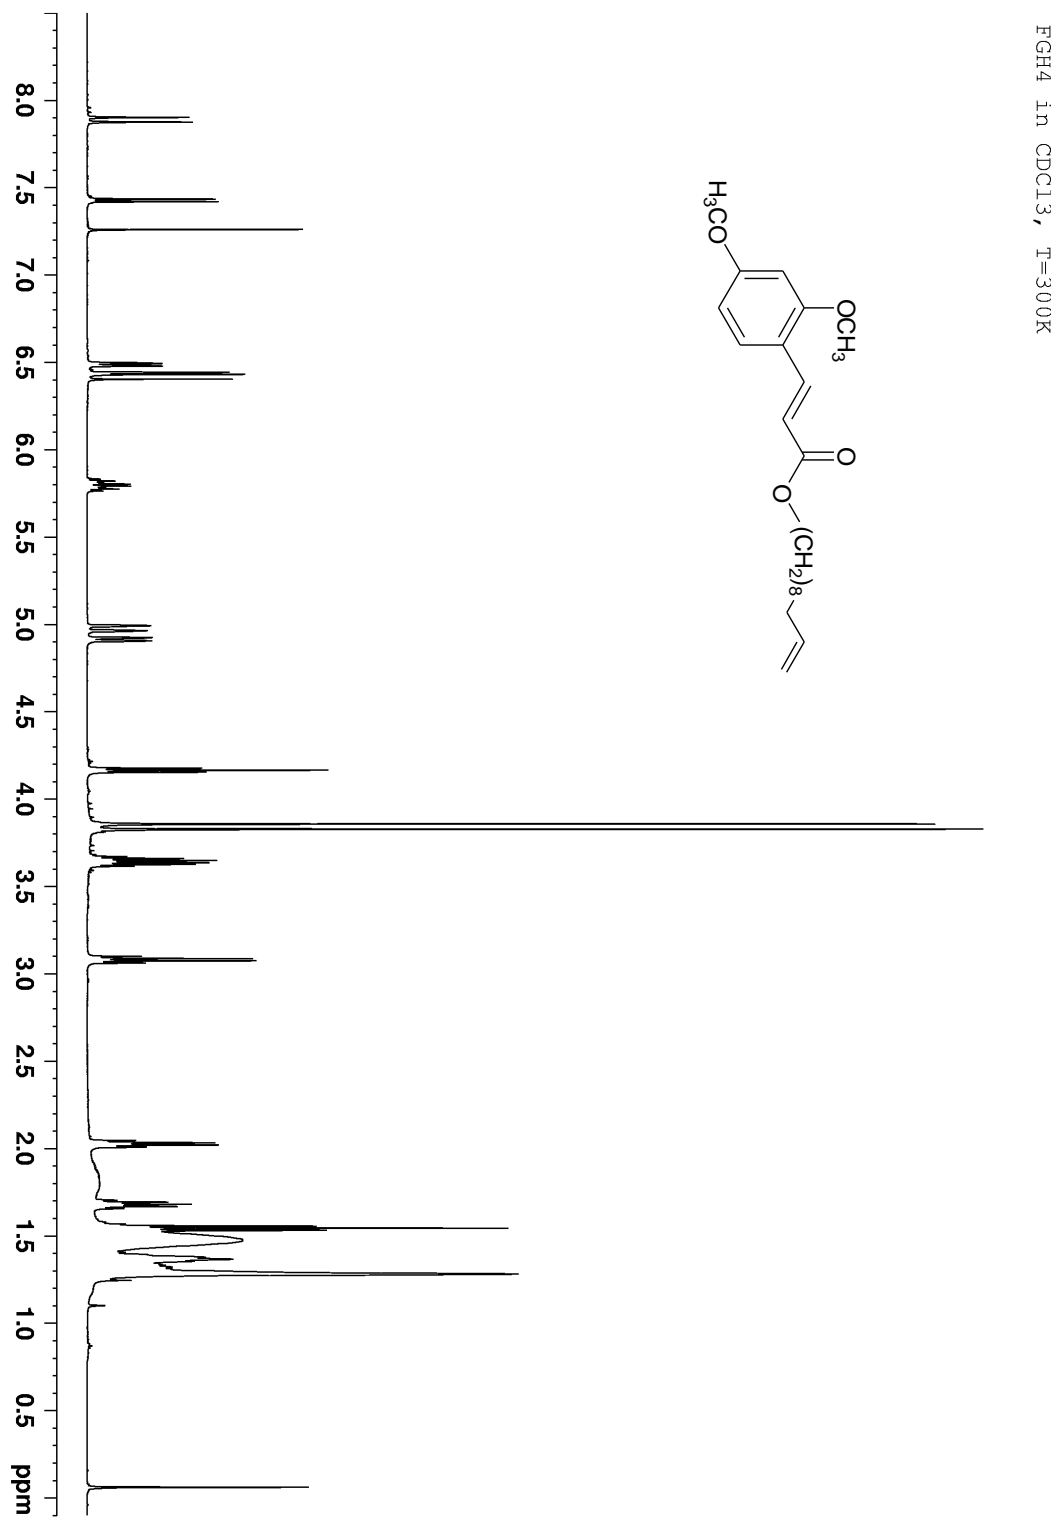

$^{13}\text{C}$  NMR spectrum of  $\omega$ -undecenyl (*E*)-2,4-dimethoxycinnamate. 100 MHz,  $\text{CDCl}_3$ , 300 K

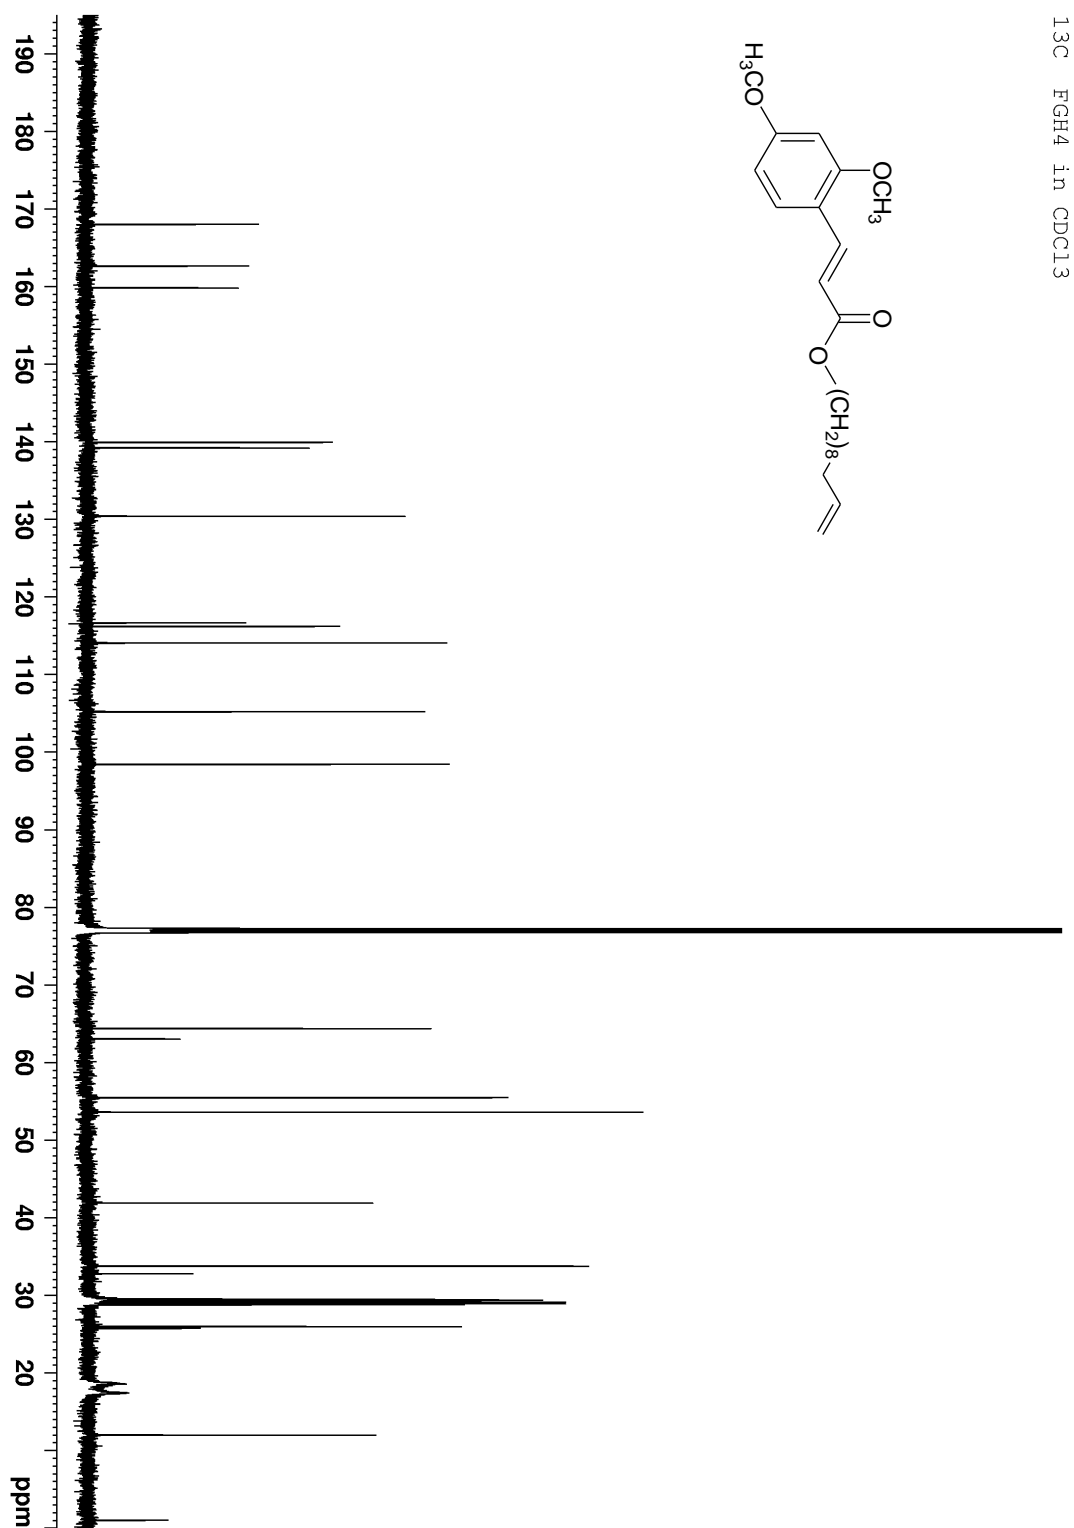

$^{13}\text{C}$  NMR spectrum of  $\omega$ -undecenyl (*E*)-2,4-dimethoxycinnamate. 100 MHz,  $\text{CDCl}_3$ , 300 K



**$^1\text{H}$  NMR spectrum of undecenyl resorc[4]arene 1a (*chair*). 600 MHz,  $\text{CDCl}_3$ , 300 K**

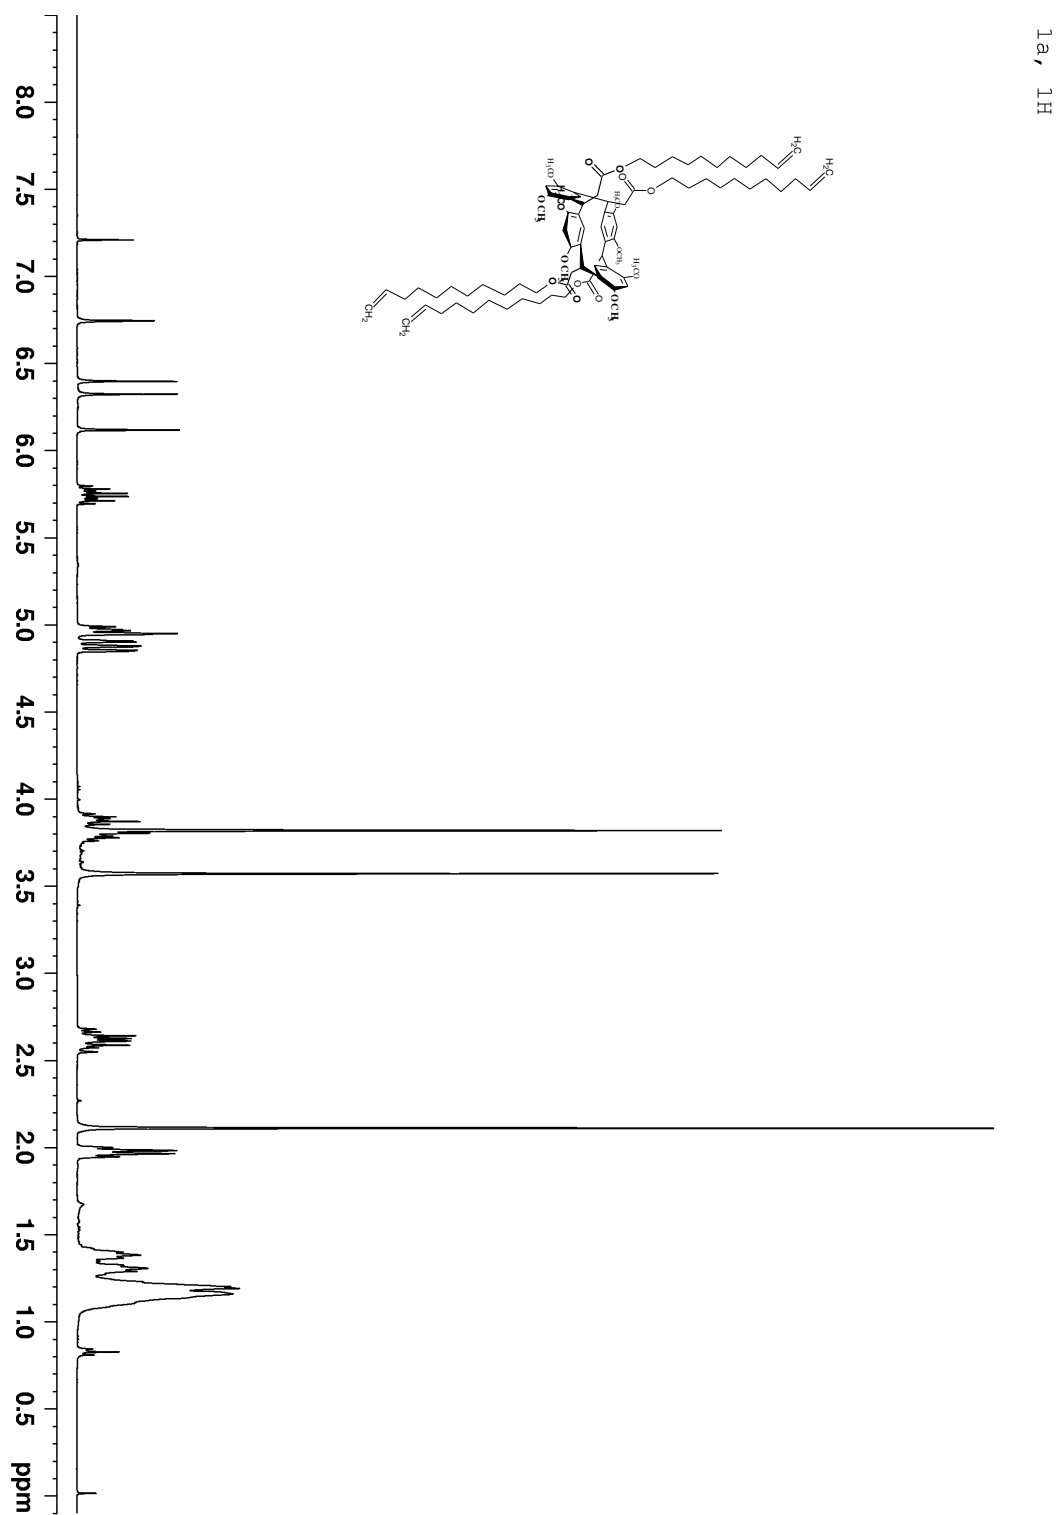

$^{13}\text{C}$  NMR spectrum of undecenyl resorc[4]arene **1a** (*chair*). 100 MHz,  $\text{CDCl}_3$ , 300 K

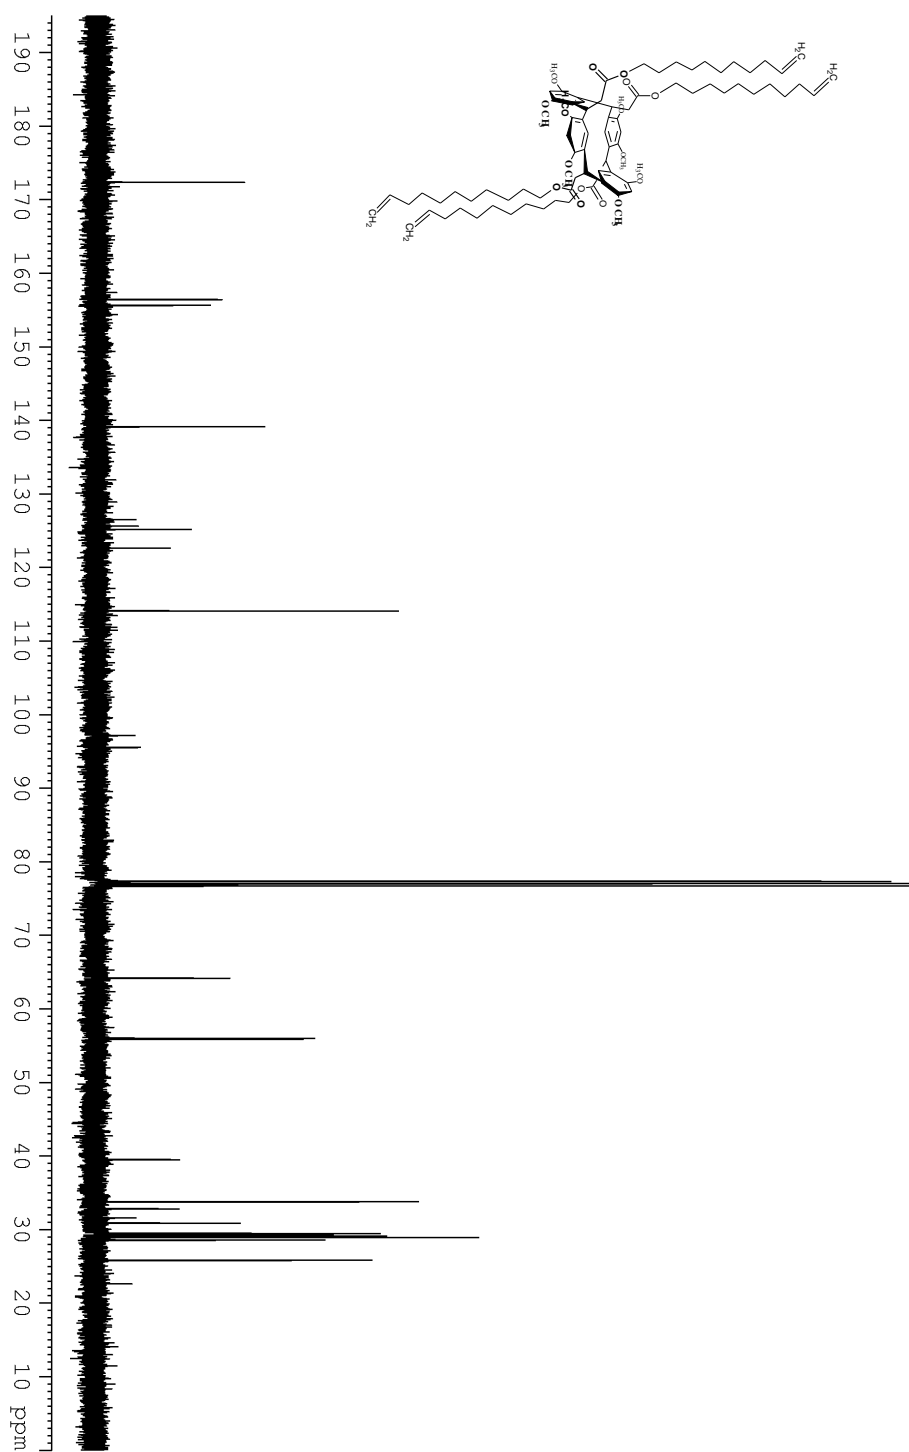

$^1\text{H}$  NMR spectrum of undecenyl resorc[4]arene **1b** (*cone*). 600 MHz,  $\text{CDCl}_3$ , 300 K

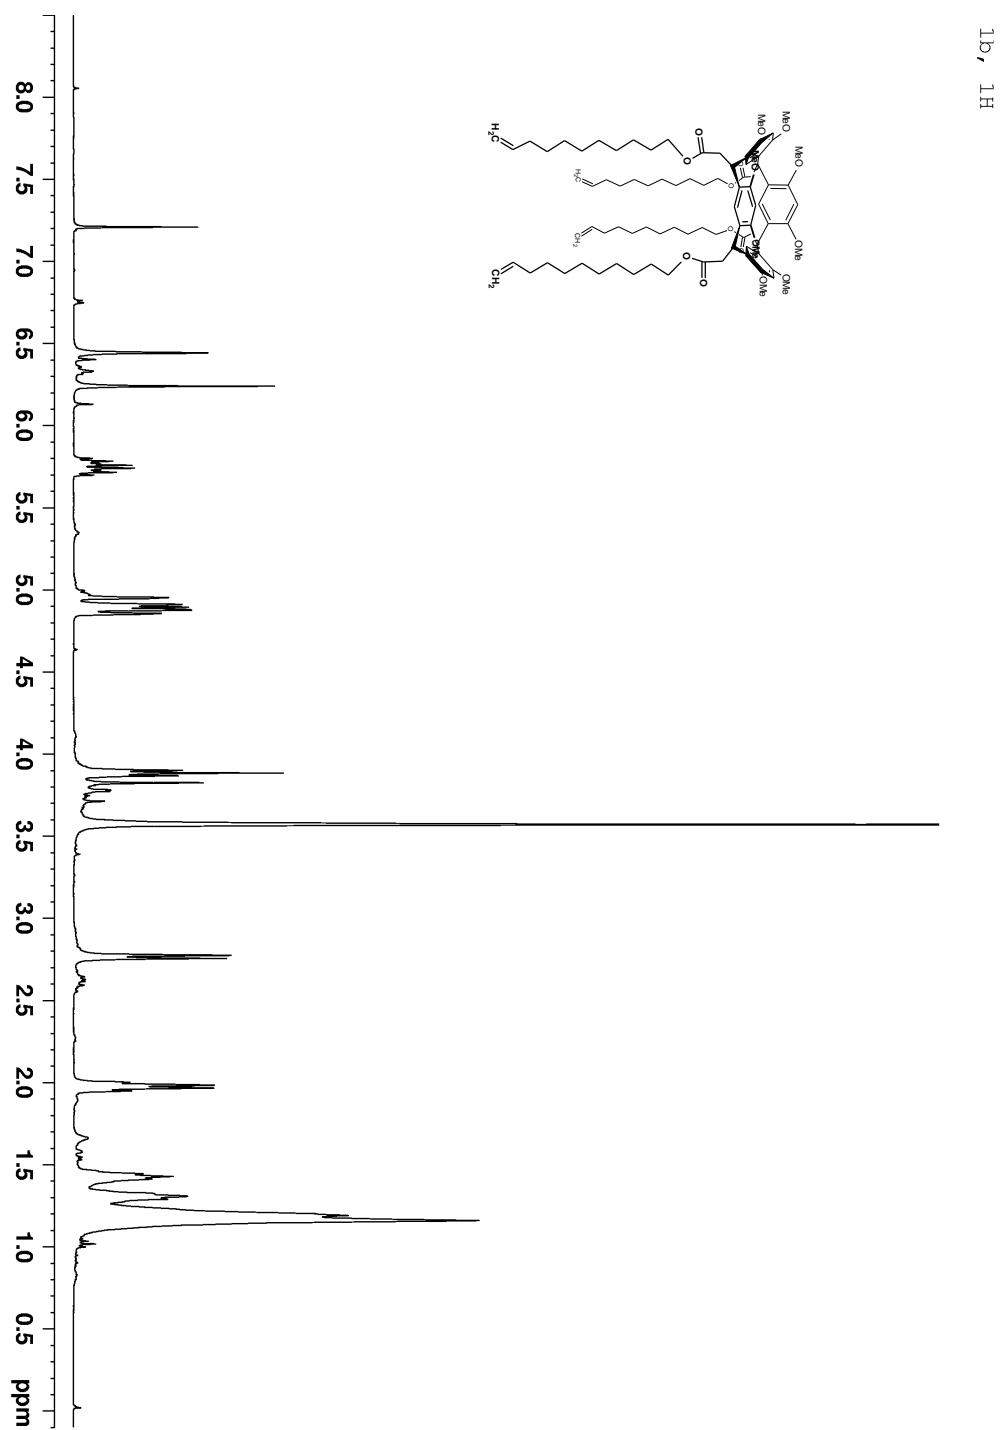

$^{13}\text{C}$  NMR spectrum of undecenyl resorc[4]arene **1b** (*cone*). 100 MHz,  $\text{CDCl}_3$ , 300 K

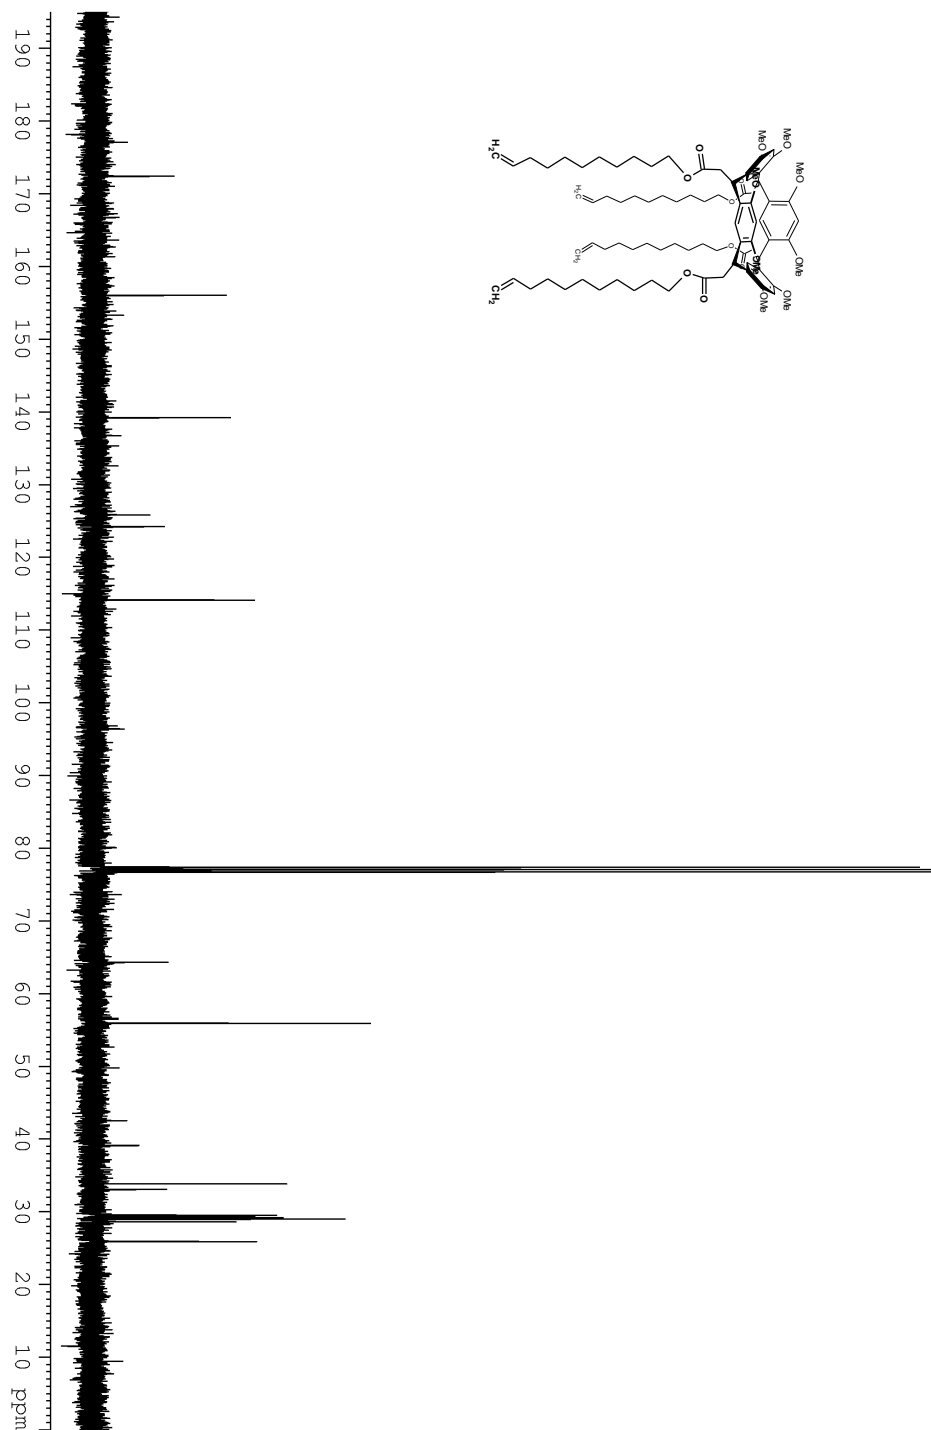

$^1\text{H}$  NMR spectrum of undecenyl resorc[4]arene **1c** (*1,2-alternate*). 600 MHz,  $\text{CDCl}_3$ , 300 K

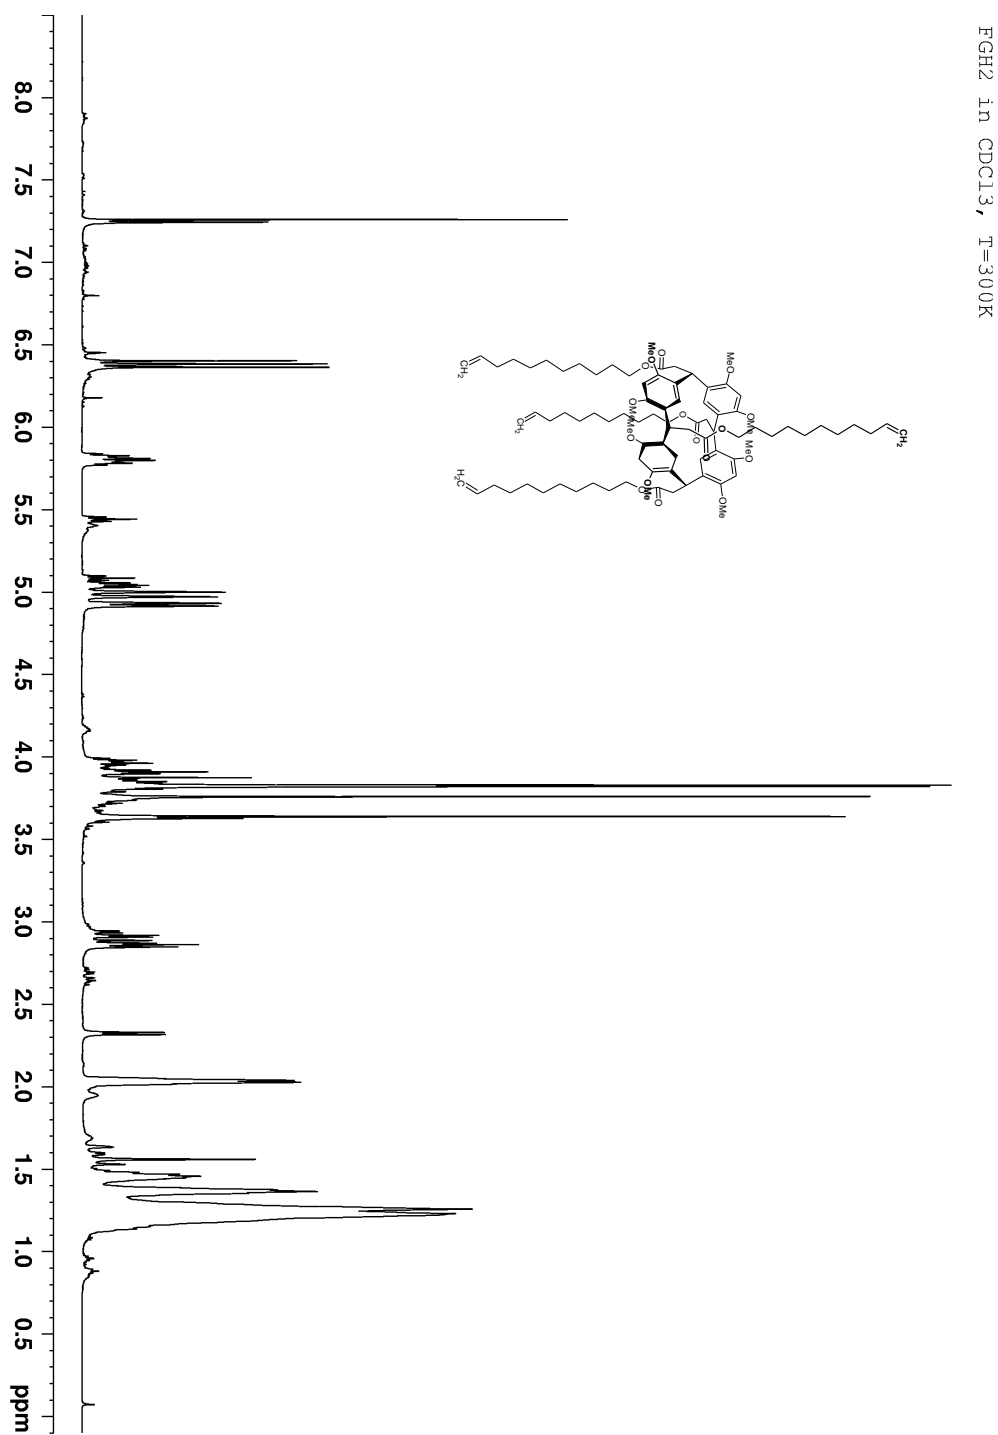

$^{13}\text{C}$  NMR spectrum of undecenyl resorc[4]arene **1c** (*1,2-alternate*). 100 MHz,  $\text{CDCl}_3$ , 300 K

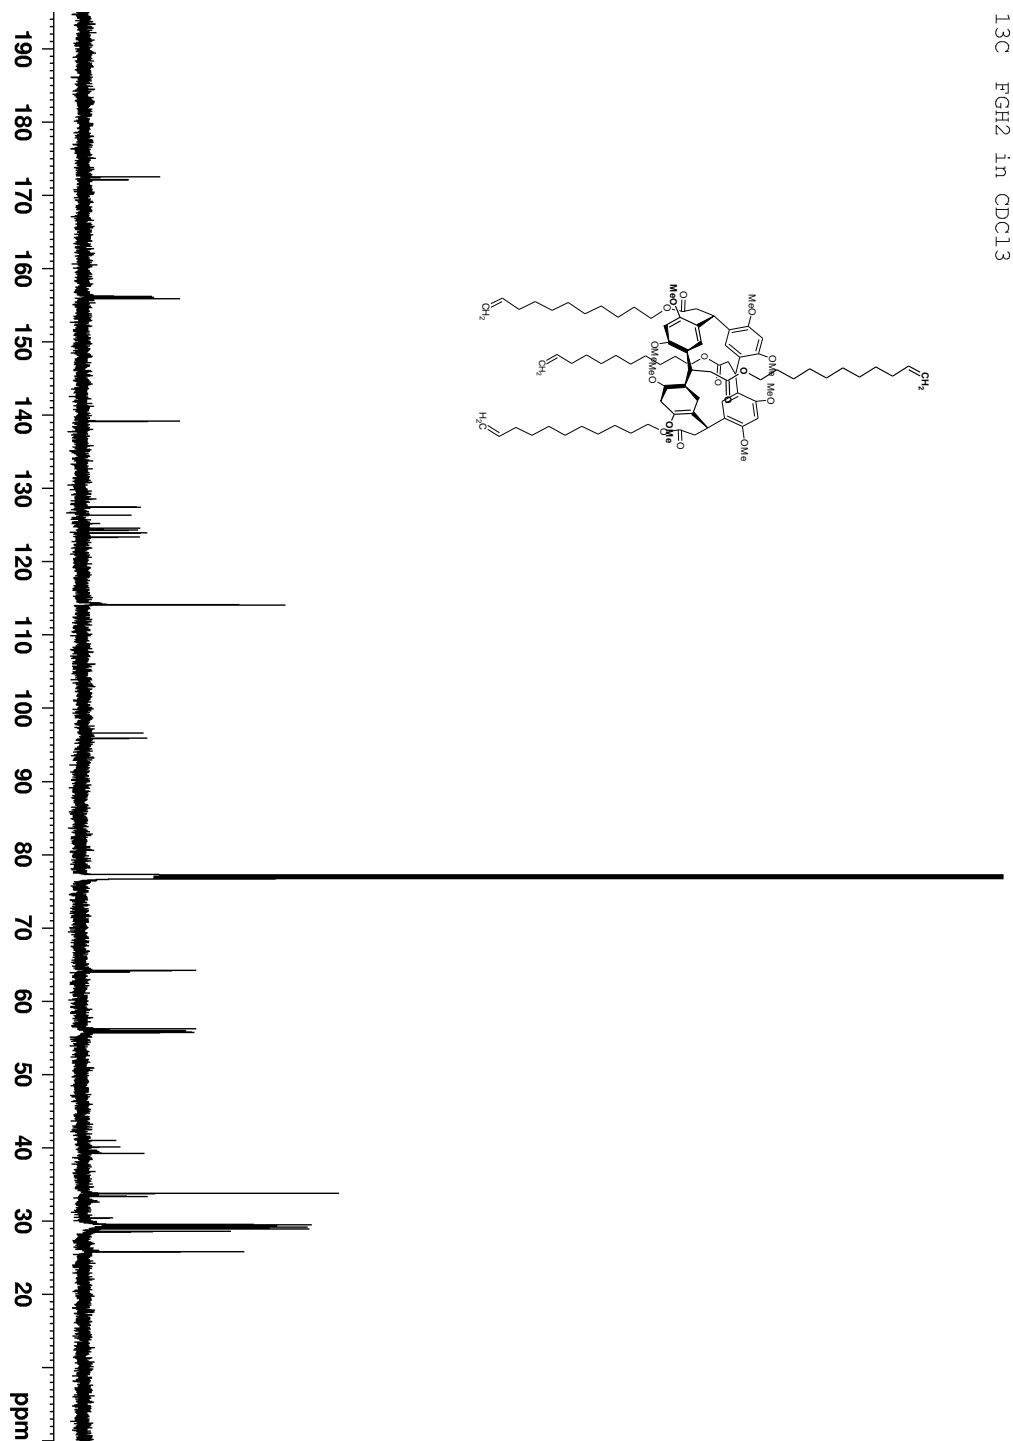

**<sup>1</sup>H NMR spectrum of bicyclic alkene 2a. 600 MHz, CDCl<sub>3</sub>, 300 K**

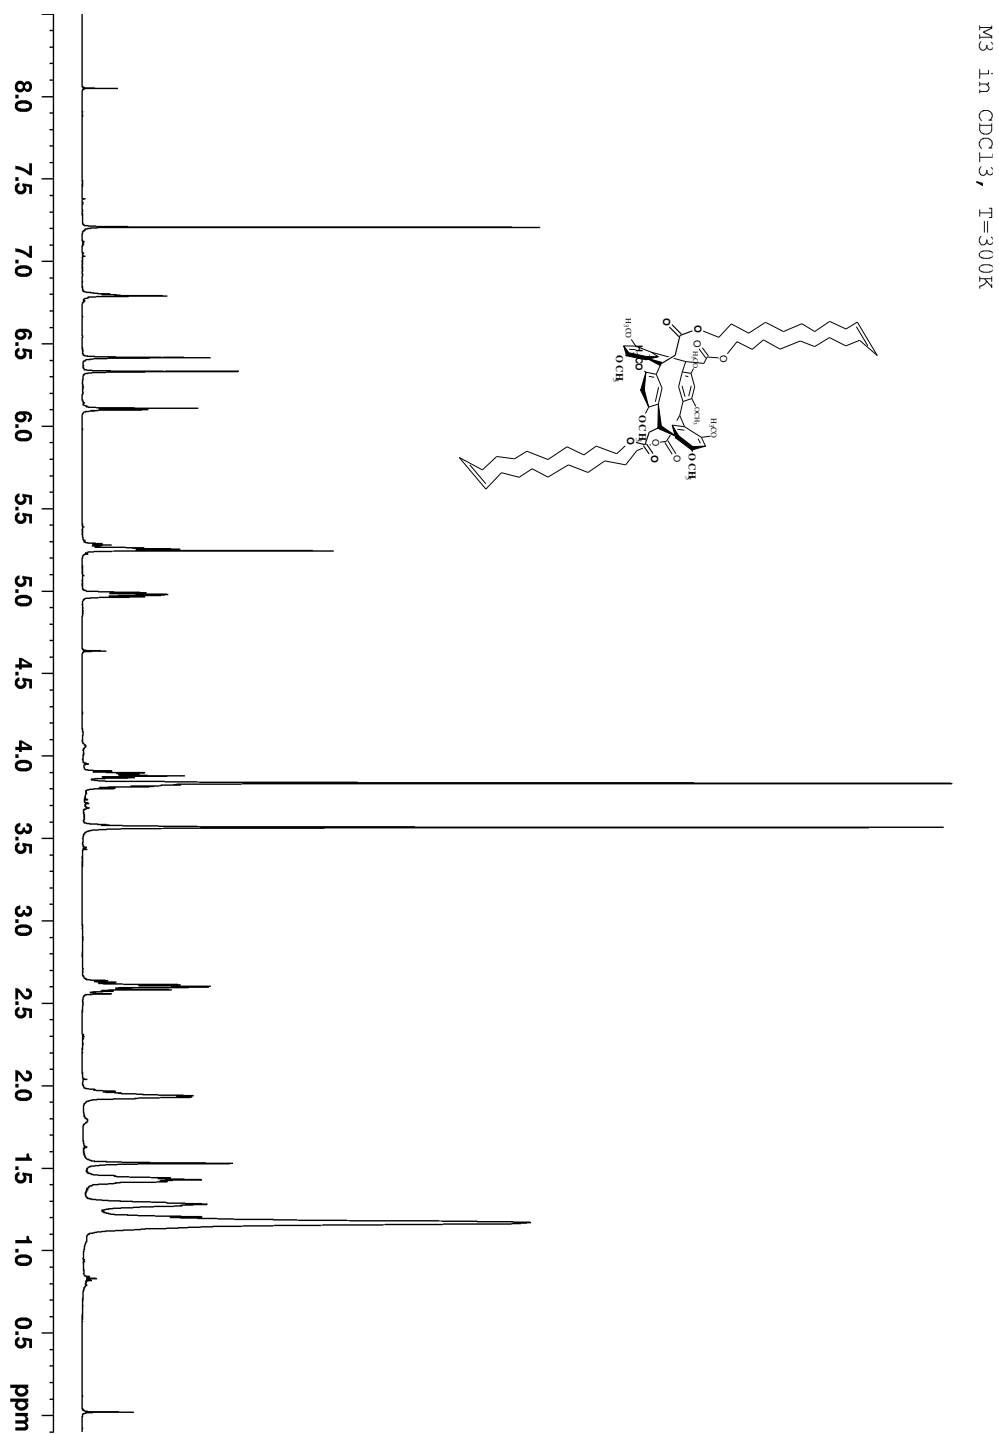

$^{13}\text{C}$  NMR spectrum of bicyclic alkene 2a. 100 MHz,  $\text{CDCl}_3$ , 300 K

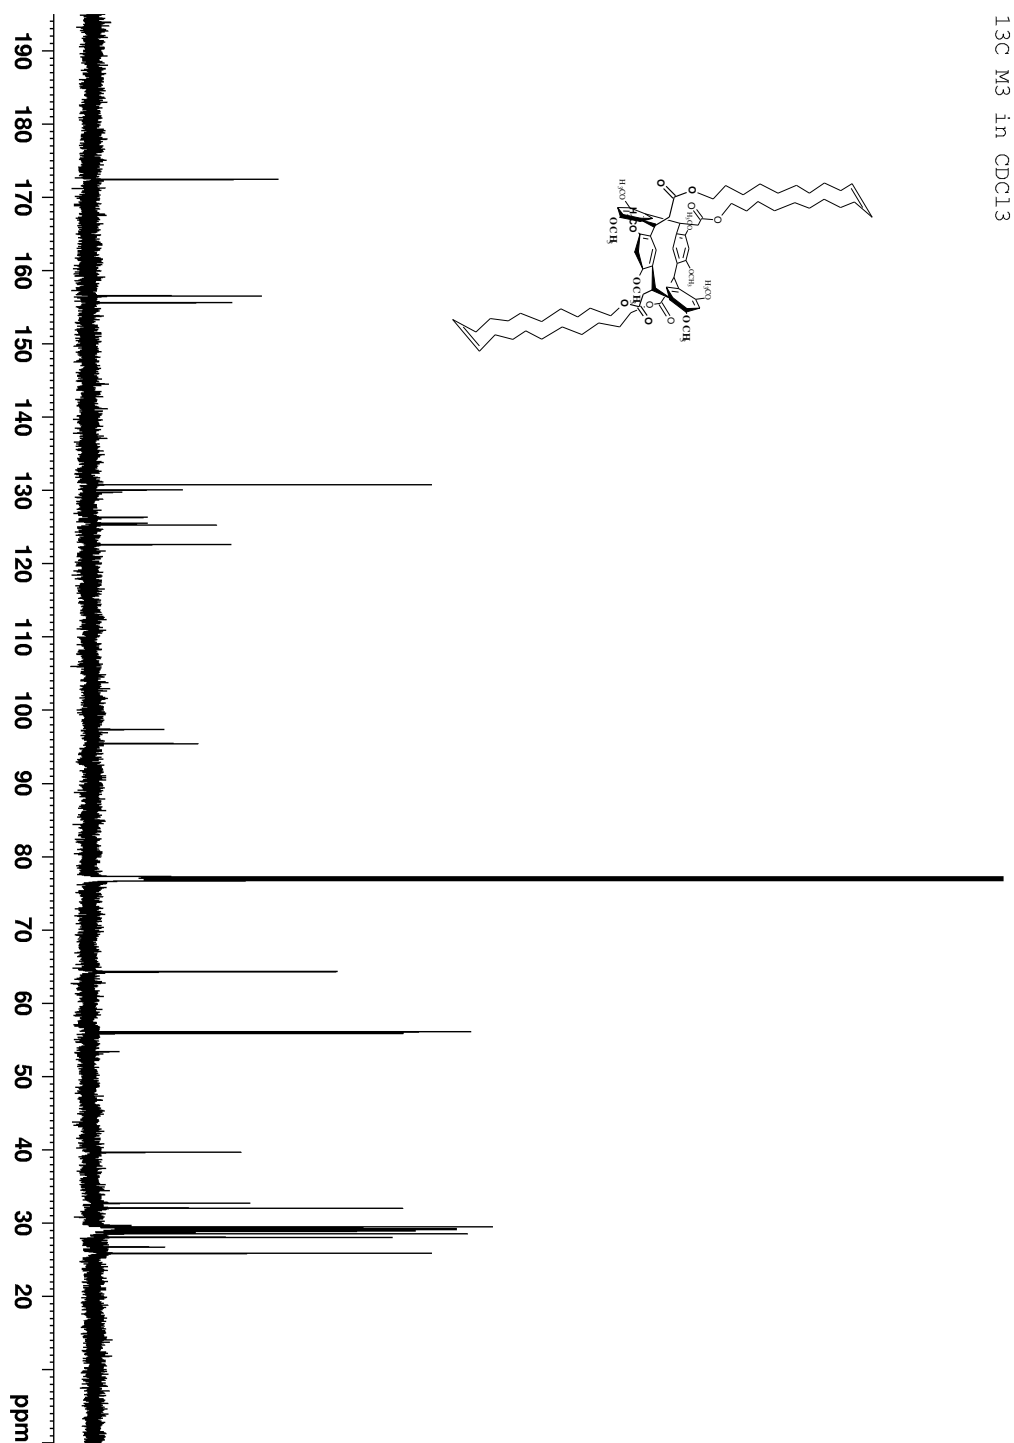

$^{13}\text{C}$  NMR in  $\text{CDCl}_3$



## 2D NMR spectra of bicyclic alkene 2a (NOESY)

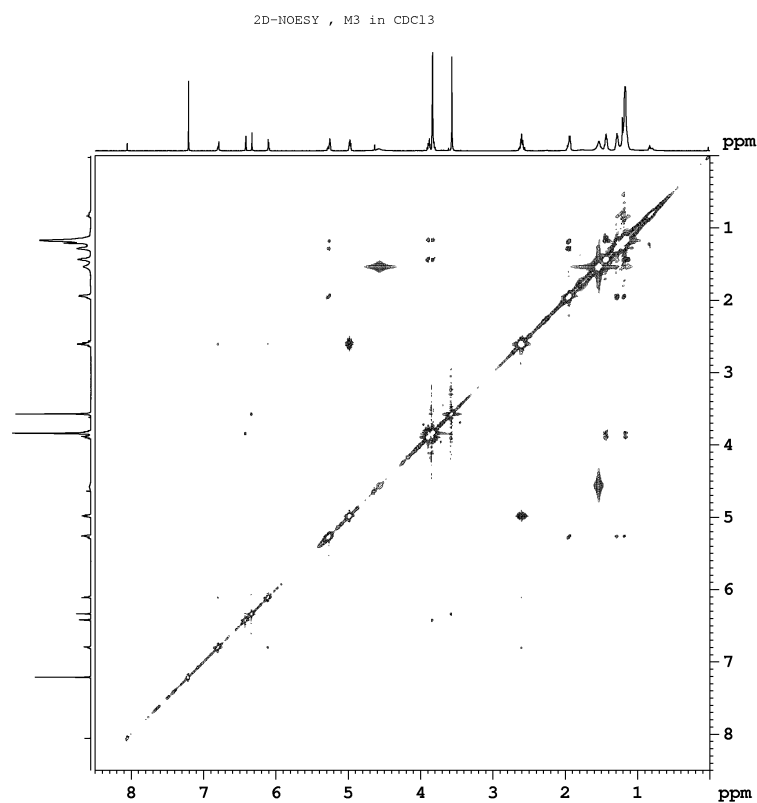

## 2D NMR spectra of bicyclic alkene 2a (TOCSY)

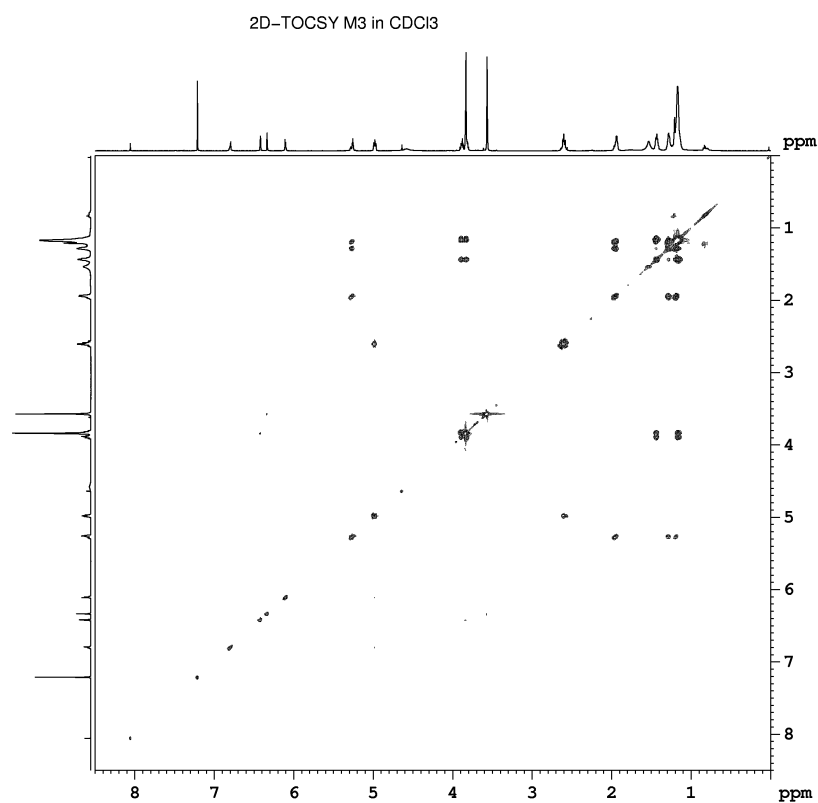

## 2D NMR spectra of bicyclic alkene 2a (HMBC)

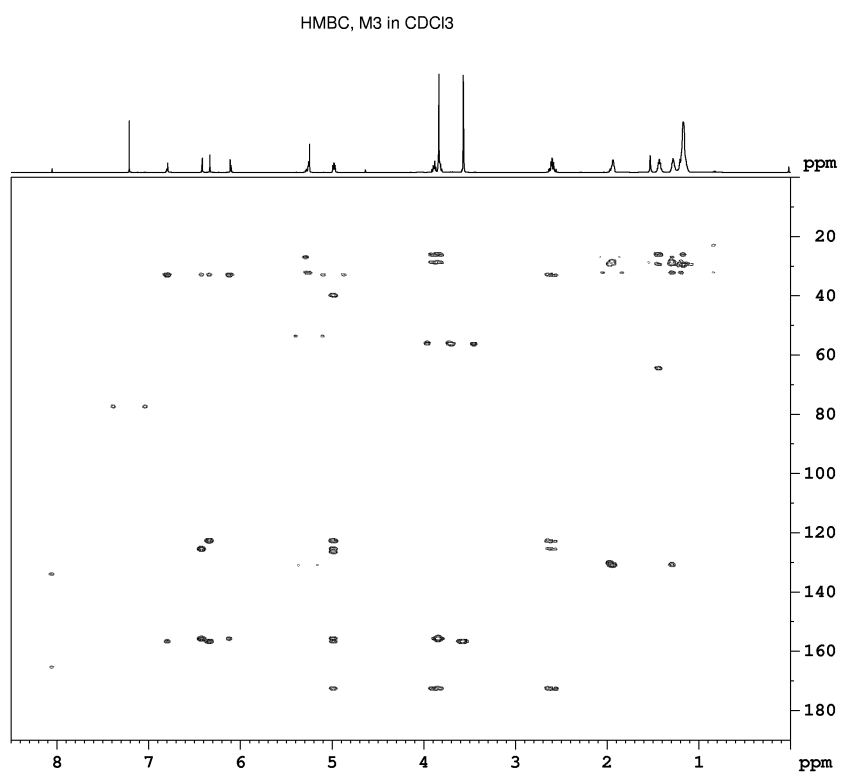

## 2D NMR spectra of bicyclic alkene 2a (HSQC)

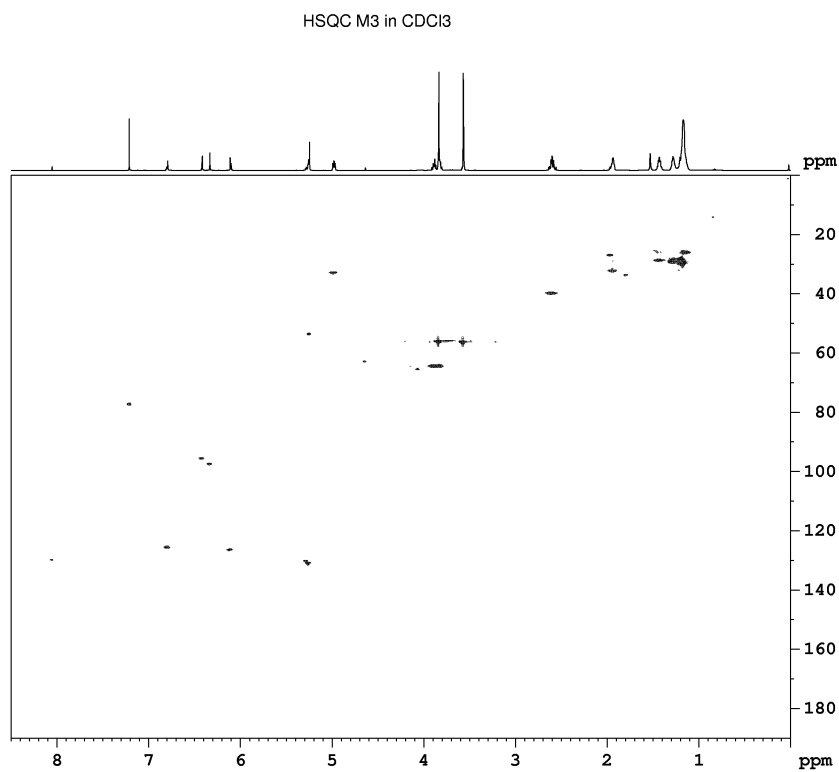

**<sup>1</sup>H NMR spectrum of linear dimer 3a. 600 MHz, CDCl<sub>3</sub>, 300 K**

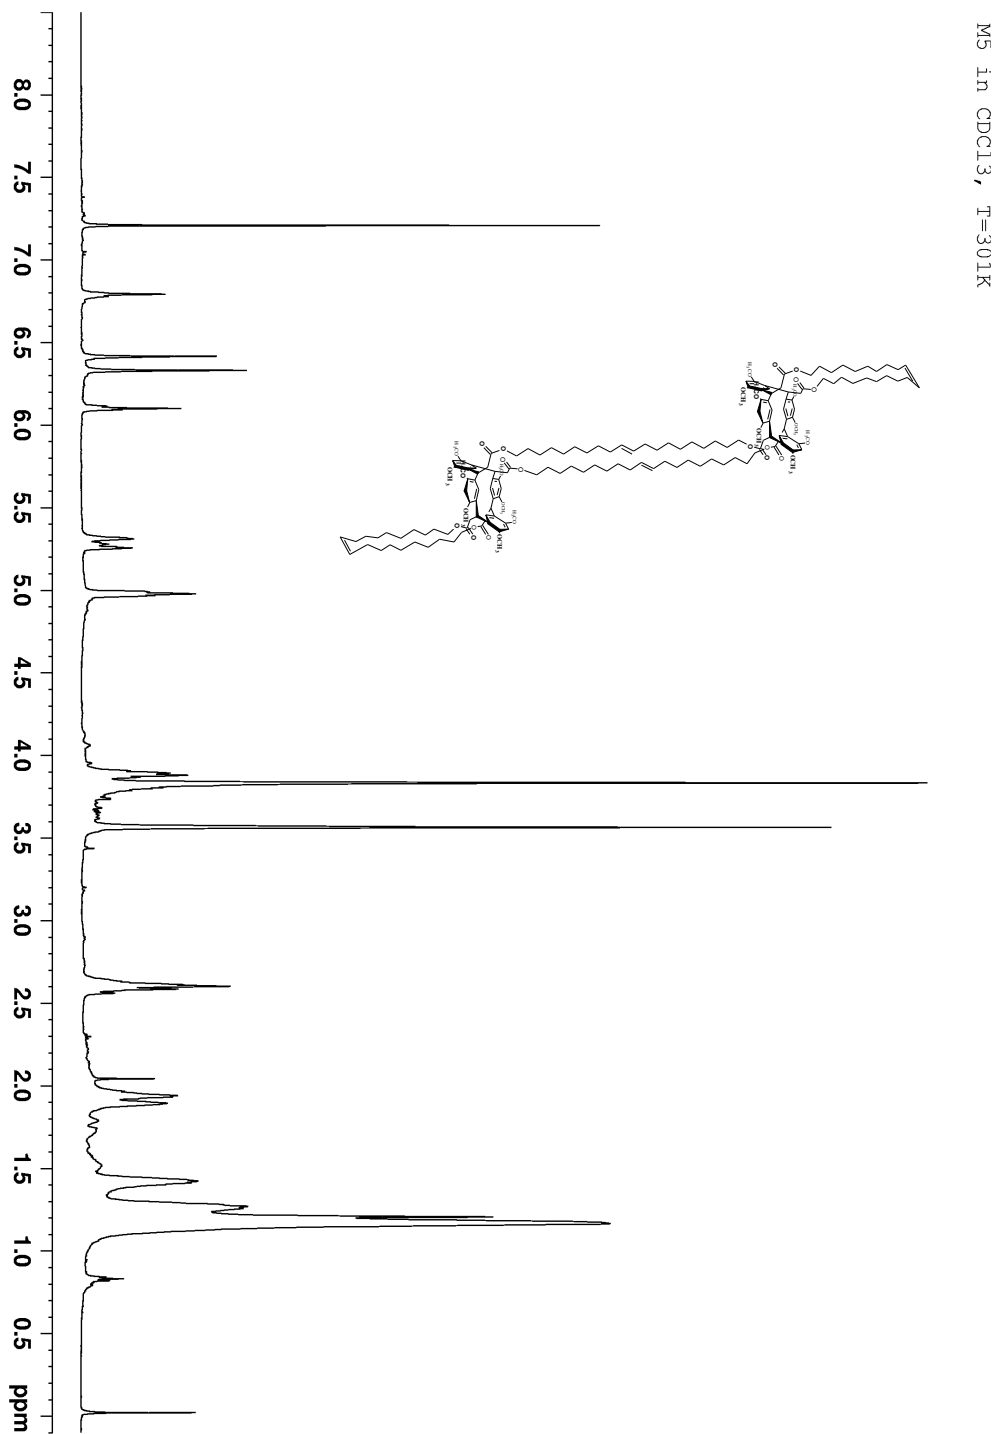

$^{13}\text{C}$  NMR spectrum of linear dimer 3a. 100 MHz,  $\text{CDCl}_3$ , 300 K

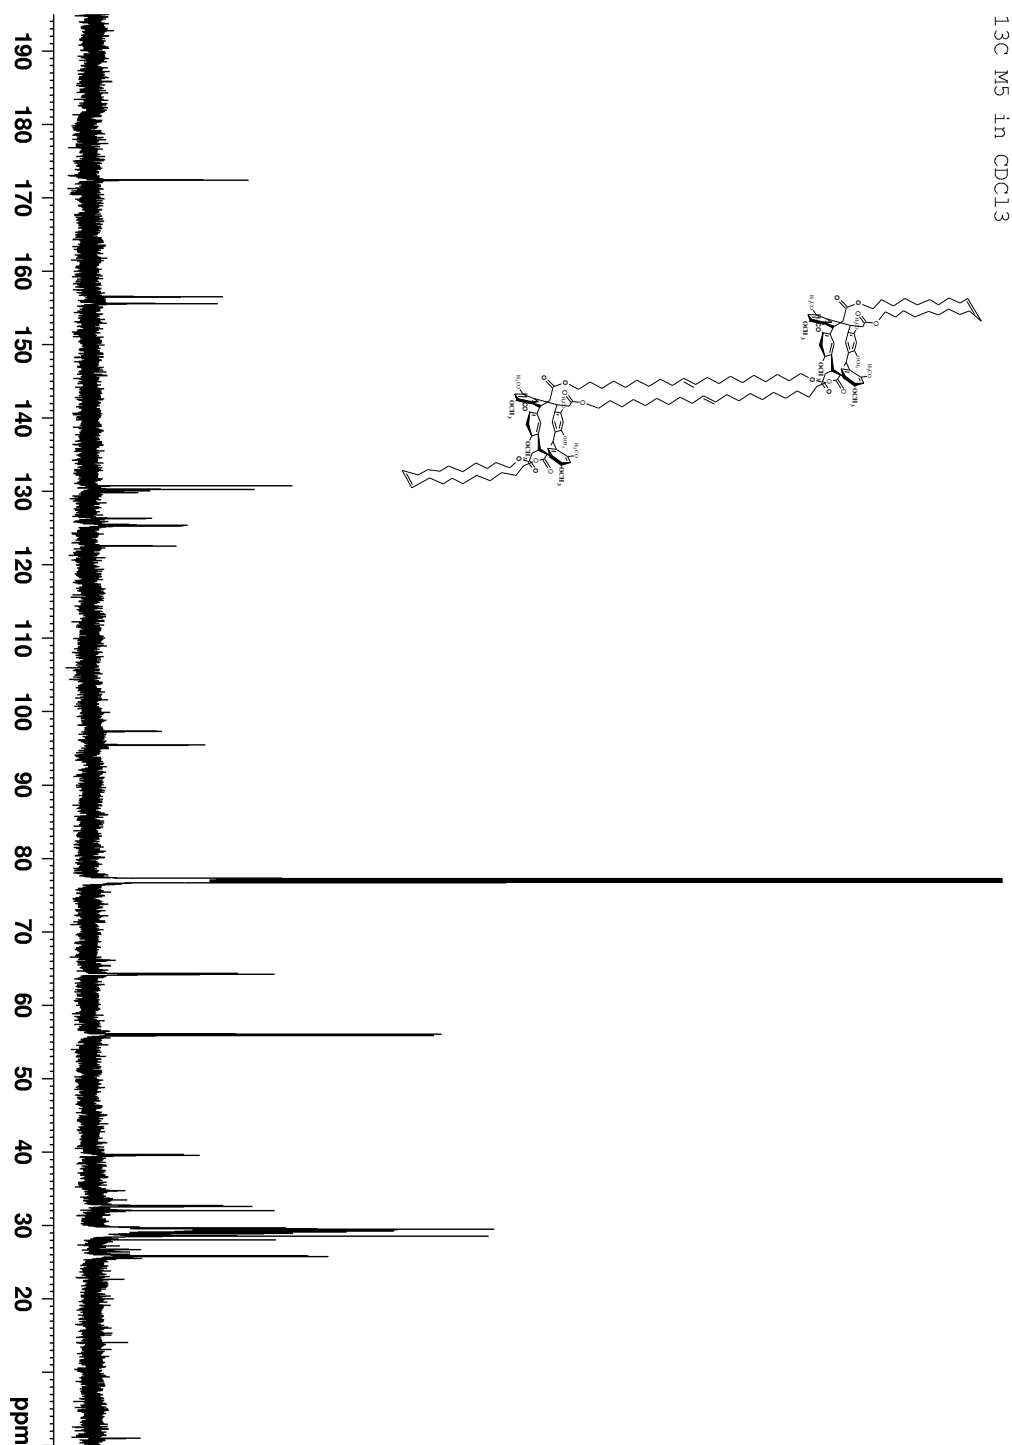

**Figure 3S.** FT-IR (KBr) spectrum of polymer **P1a**

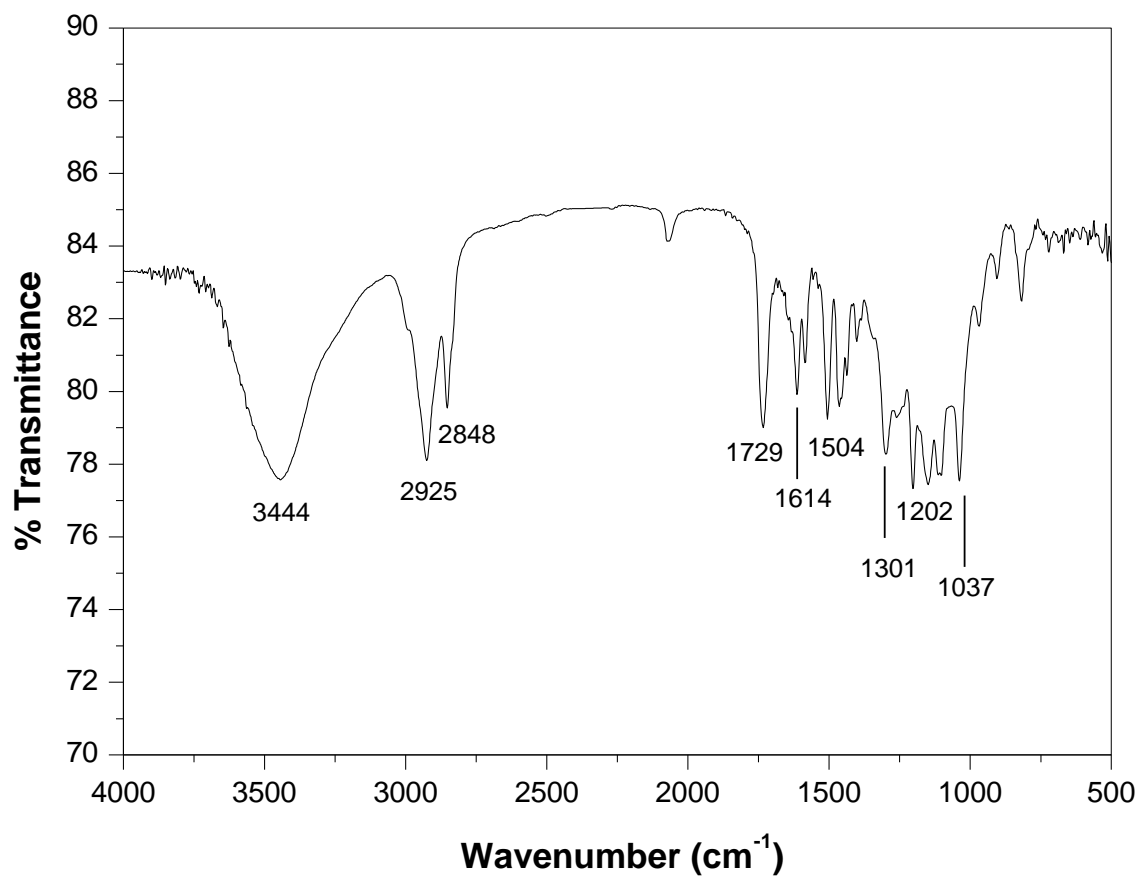

**$^1\text{H}$  NMR spectrum of compound 2ar. 400 MHz,  $\text{CDCl}_3$ , 300 K**

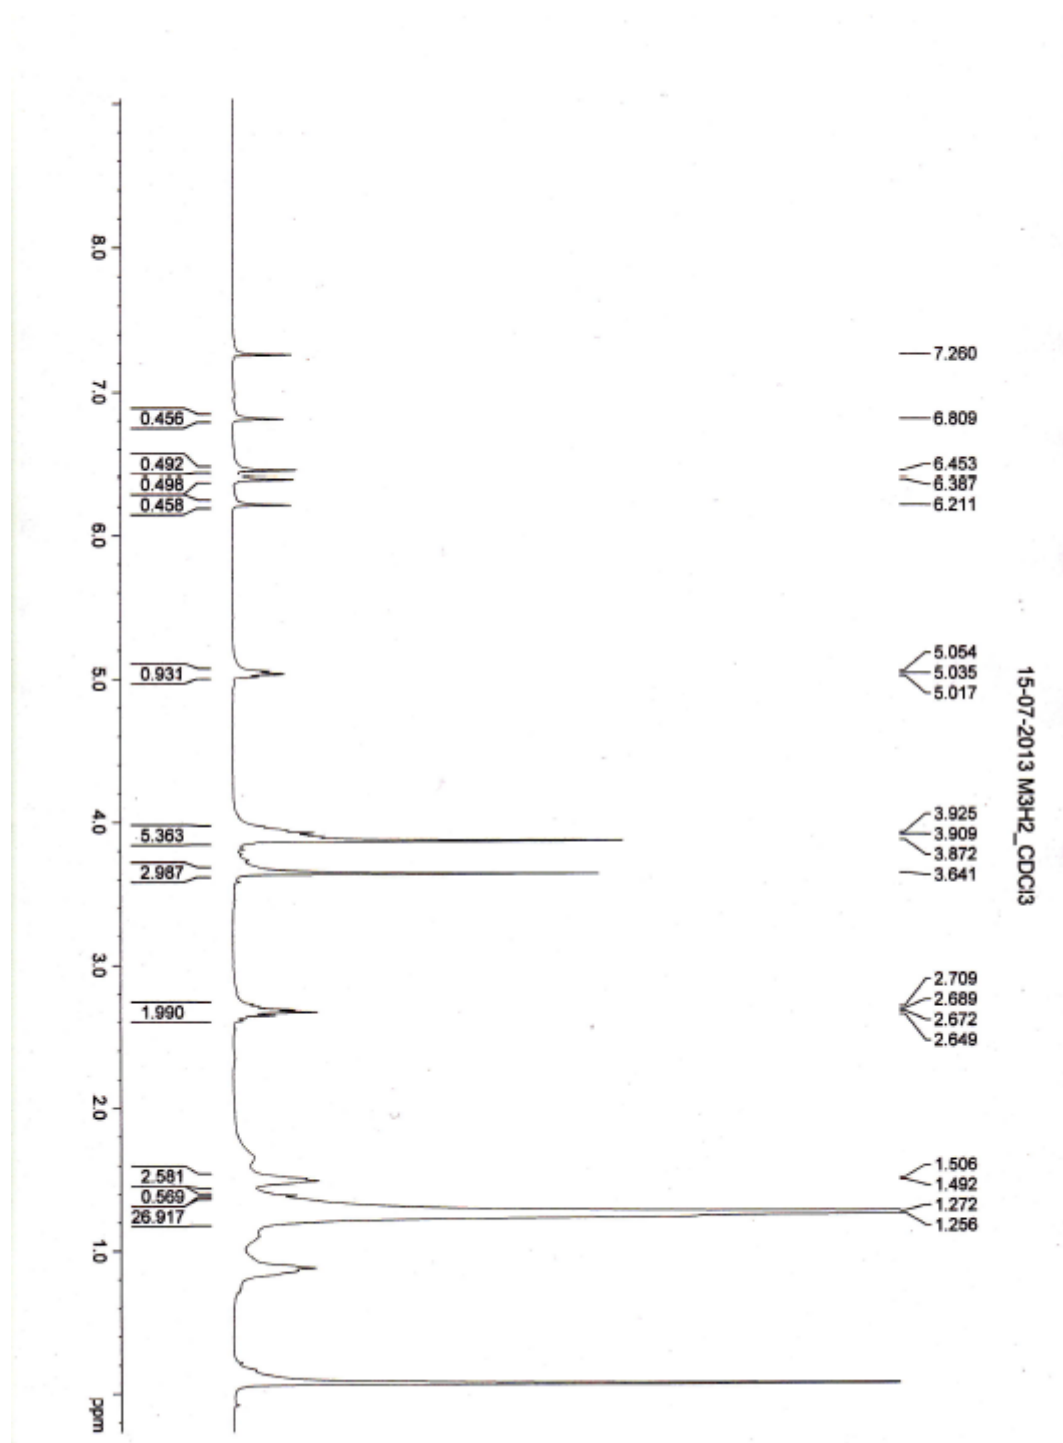



$^{13}\text{C}$  NMR spectrum of compound 2a. 100 MHz,  $\text{CDCl}_3$ , 300 K

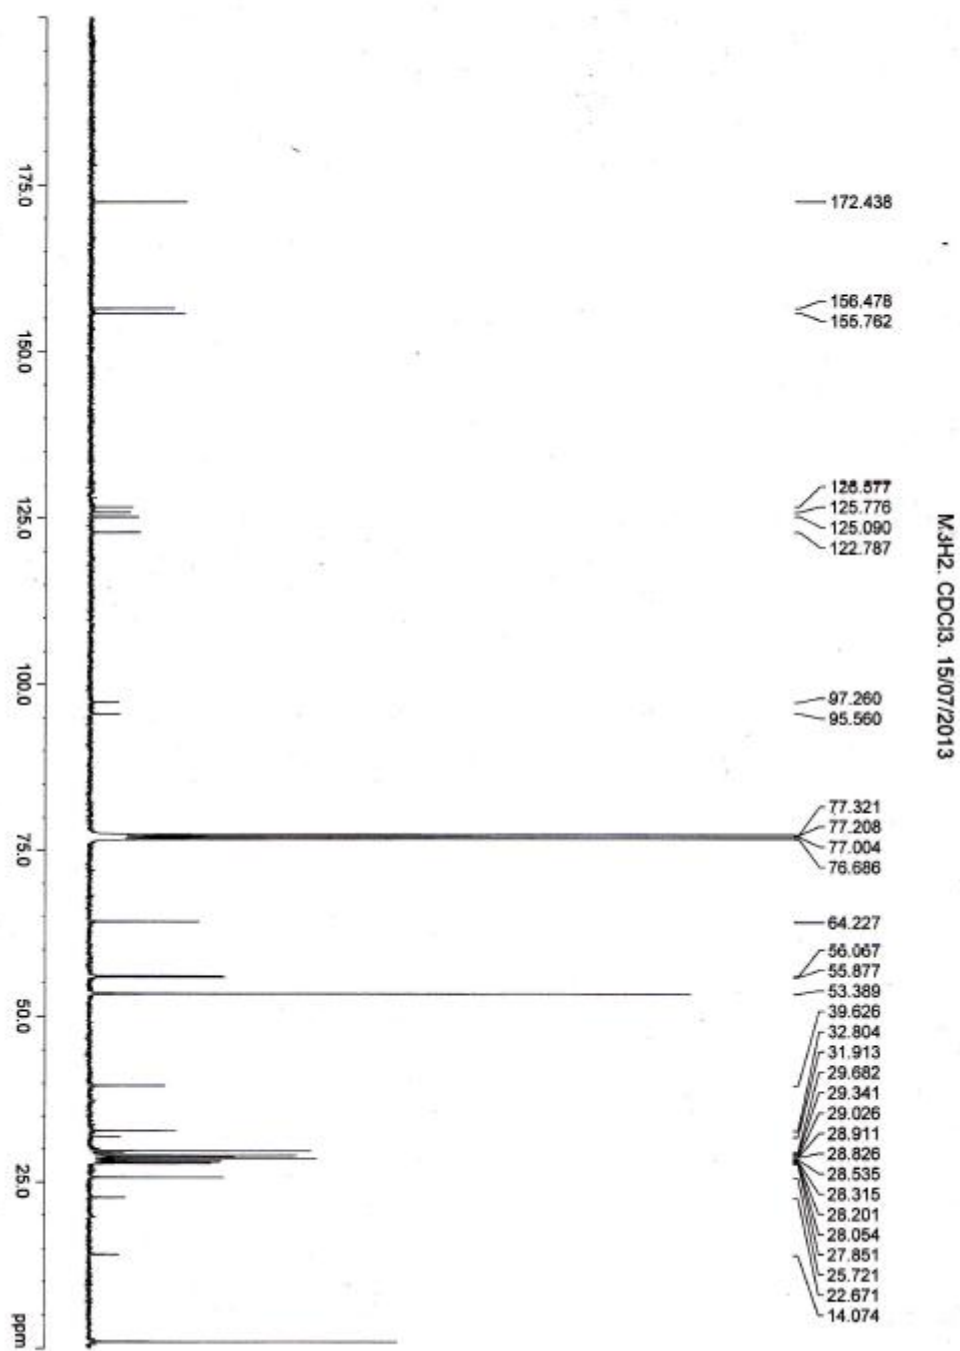

### ESI-HRMS spectrum of compound 2ar. Solvent: MeCN (5 ppm)

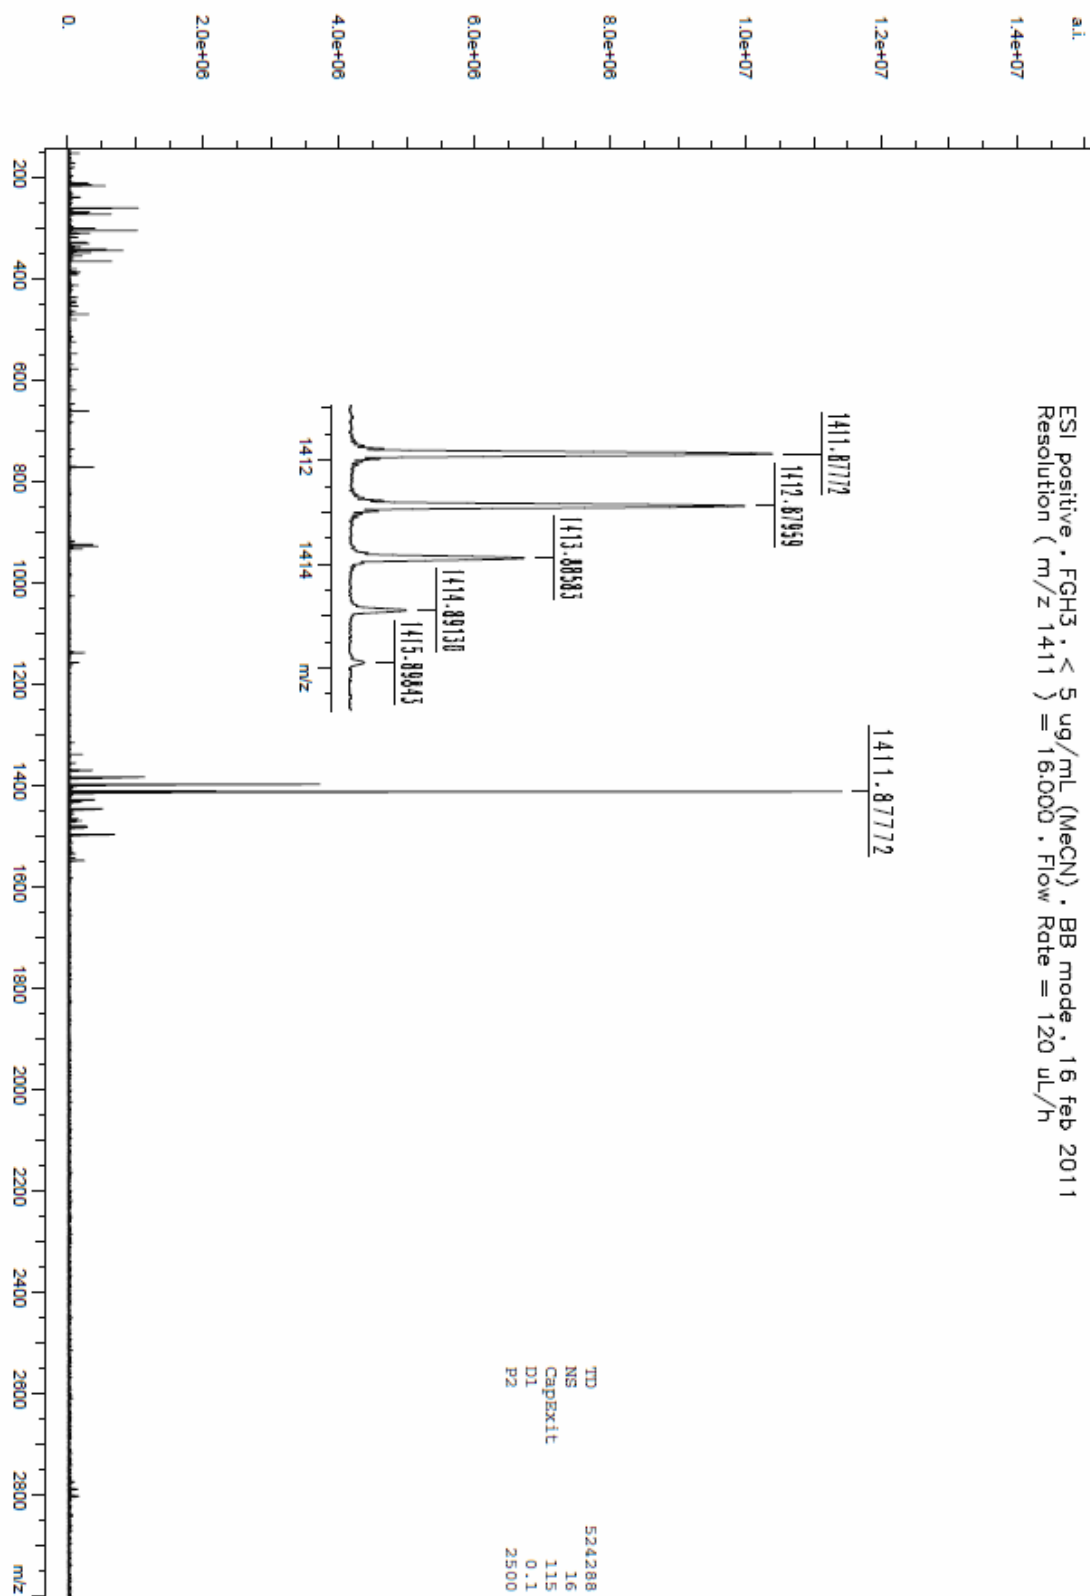

## Computational methods

The Gaussian 09 program [4S] was used for the *ab initio* molecular orbital calculations. 6-311++G\*\*, aug-cc-pVDZ, and aug-cc-pVTZ basis sets were used. Electron correlation energies were corrected by the second-order Møller-Plesset perturbation method (MP2) [5S,6S]. Geometries of isolated molecules were optimized at the MP2/6-311++G\*\* level and were used for calculations of the interaction energies of the resorcinol-ethylene complexes. Basis set superposition error (BSSE) [7S] was corrected by the counterpoise method of Simon [8S] implemented in Gaussian 09.

### **Solid state $^{13}\text{C}$ CPMAS NMR spectroscopy**

Solid state  $^{13}\text{C}$  CPMAS NMR spectra were measured on a Bruker Avance III spectrometer at 100.63 MHz. Samples were packed into 4 mm zirconia rotors, and sealed with Kel-F caps. The spin rate was 8 kHz. The cross polarization (CP) was performed by applying the variable spin-lock sequence RAMP-CPMAS [9S]; the RAMP was applied on the  $^1\text{H}$  channel and during the contact time the amplitude of the RAMP was increased from 50 to 100% of the maximum value. All the spectra were obtained at room temperature, with a contact time optimized at 6 ms, the recycle delay being 3 s and acquired with a time domain of 1024 data points, zero filled and Fourier transformed with a size of 4096 data points, applying an exponential multiplication with a line broadening of 4 Hz.  $^{13}\text{C}$  chemical shifts were referenced to tetramethylsilane used as an external reference.

### Cartesian coordinates (Å) for model complex (A)

| <i>Atom</i> | <i>x</i>    | <i>y</i>    | <i>z</i>    |
|-------------|-------------|-------------|-------------|
| C           | 12.80975546 | 7.92727560  | -2.48757130 |
| C           | 13.07512885 | 9.21075977  | -2.93531044 |
| C           | 10.84086326 | 9.53742799  | -3.64278803 |
| C           | 10.51593875 | 8.26766875  | -3.19517152 |
| H           | 12.37513845 | 11.03589065 | -3.84890907 |
| H           | 13.60283534 | 7.31041213  | -2.11096439 |
| C           | 12.15991417 | 11.90769951 | -0.80208345 |
| C           | 12.55617455 | 13.14785841 | -0.48854505 |
| H           | 12.89502659 | 11.15136291 | -1.05662163 |
| H           | 11.10374536 | 11.65923987 | -0.80157900 |
| H           | 13.61234336 | 13.39631806 | -0.48904952 |
| H           | 11.82106214 | 13.90419501 | -0.23400684 |
| C           | 11.50180137 | 7.49188163  | -2.61063303 |
| H           | 11.23559330 | 6.51847267  | -2.24018296 |
| C           | 12.12715346 | 10.04182272 | -3.51362355 |
| H           | 9.50816195  | 7.92602934  | -3.33300270 |
| O           | 14.35764536 | 9.60241465  | -2.79797202 |
| H           | 14.45453783 | 10.47908175 | -3.12303608 |
| O           | 9.83229912  | 10.29222692 | -4.12255980 |
| H           | 10.16714840 | 11.12764395 | -4.39376885 |

### Cartesian coordinates (Å) for model complex (B)

| <i>Atom</i> | <i>x</i>    | <i>y</i>   | <i>z</i>    |
|-------------|-------------|------------|-------------|
| O           | 15.50029923 | 8.43747519 | 3.31149209  |
| O           | 16.41789348 | 6.52219188 | -1.00445420 |
| H           | 17.30930860 | 6.33251802 | -0.77423060 |
| H           | 16.37139162 | 8.28123288 | 3.62833020  |
| H           | 17.10095500 | 7.33929434 | 1.46239900  |
| C           | 13.48373013 | 8.00317611 | 0.36827157  |
| H           | 12.47762577 | 8.22342630 | 0.06026364  |
| C           | 14.65611763 | 3.33267609 | 1.46310411  |
| H           | 13.73470794 | 2.88026280 | 1.11037253  |
| H           | 15.54406198 | 2.72273962 | 1.59586515  |
| C           | 15.16280184 | 8.09719432 | 2.05156810  |
| C           | 16.07405280 | 7.51184616 | 1.18350519  |
| C           | 15.64883969 | 7.13733890 | -0.08398995 |
| C           | 14.36511074 | 7.41612113 | -0.52278996 |
| H           | 14.01155758 | 7.20447283 | -1.51351402 |
| C           | 13.85271046 | 8.32319004 | 1.66322353  |
| H           | 13.16335567 | 8.73785342 | 2.37327512  |
| C           | 14.69740663 | 4.64338660 | 1.73450031  |
| H           | 13.81173440 | 5.25672563 | 1.60306204  |
| H           | 15.61970666 | 5.09384516 | 2.08709898  |

## References

- [1S] Burla, M. C.; Calandro, R.; Cavalli, M.; Carrozzini, B.; Cascarano, G. L.; De Caro, L.; Giacovazzo, C.; Polidori, G.; Spagna, R. *J. Appl. Crystallogr.* **2005**, *38*, 1381.
- [2S] Sheldrick, G. M. SHELX-97, *Program for Crystal Structure Refinement*, University of Göttingen, 1997; <http://shelx.uni-ac.gwdg.de/shelx/index.html>.
- [3S] Nardelli, M. PARST97, updated version of PARST95, *J. Appl. Crystallogr.* **1995**, *28*, 659.
- [4S] Gaussian 09, Revision A.02, M. J. Frisch, G. W. Trucks, H. B. Schlegel, G. E. Scuseria, M. A. Robb, J. R. Cheeseman, G. Scalmani, V. Barone, B. Mennucci, G. A. Petersson, H. Nakatsuji, M. Caricato, X. Li, H. P. Hratchian, A. F. Izmaylov, J. Bloino, G. Zheng, J. L. Sonnenberg, M. Hada, M. Ehara, K. Toyota, R. Fukuda, J. Hasegawa, M. Ishida, T. Nakajima, Y. Honda, O. Kitao, H. Nakai, T. Vreven, J. A. Montgomery, Jr., J. E. Peralta, F. Ogliaro, M. Bearpark, J. J. Heyd, E. Brothers, K. N. Kudin, V. N. Staroverov, R. Kobayashi, J. Normand, K. Raghavachari, A. Rendell, J. C. Burant, S. S. Iyengar, J. Tomasi, M. Cossi, N. Rega, J. M. Millam, M. Klene, J. E. Knox, J. B. Cross, V. Bakken, C. Adamo, J. Jaramillo, R. Gomperts, R. E. Stratmann, O. Yazyev, A. J. Austin, R. Cammi, C. Pomelli, J. W. Ochterski, R. L. Martin, K. Morokuma, V. G. Zakrzewski, G. A. Voth, P. Salvador, J. J. Dannenberg, S. Dapprich, A. D. Daniels, O. Farkas, J. B. Foresman, J. V. Ortiz, J. Cioslowski, and D. J. Fox, Gaussian, Inc., Wallingford CT, 2009.
- [5S] Møller, C.; Plesset, M. *Phys. Rev.* **1934**, *46*, 618.
- [6S] Head-Gordon, M.; Pople, J. A.; Frisch, M. J. *Chem. Phys. Lett.* **1988**, *153*, 503.
- [7S] Ransil, B. J. *J. Chem. Phys.* **1961**, *34*, 2109.
- [8S] Simon, S.; Duran, M.; Dannenberg, J. J. *J. Chem. Phys.* **1996**, *105*, 11024.
- [9S] Metz G.; Wu, X.; Smith, S. O. *J. Magn. Reson.* **1994**, *110*, 219.
